# Supplementary material for: The prevalence and clinical characteristics of diabetes mellitus in Chinese inpatients with chronic schizophrenia: a multicenter cross-sectional study
Source: PeerJ. 2021 Nov 30;9:e12553. doi: 10.7717/peerj.12553 (PMC8641481; doi:10.7717/peerj.12553)
Supplement: Supplemental Information 1 [file peerj-09-12553-s001.xlsx]

## Sheet: Sheet1
number	Ad(hospital）	sex（1：male)	age(year)	Education	marriage(1Never married 2 Married 3 Divorced 4 widowed）	weight	height	BMI	waist circumference	Waist-hip ratio	diabetes（1:yes,2:no）	Hypertension（1:yes,2:no）	Cerebrovascular disease(1 yes,2 no)	Age at onset of schizophrenia	Total length of hospitalization(month)	Antipsychotic medication	Antipsychotic dose（CZP, mg/day）	Sedatives（1:use 0:None）	dose of Sedatives(mg)	Total score of PANSS-Positive	Total score of PANSS-negative	Total score of PANSS-General psychopathology	Total of PANSS	RBANS score	Fasting plasma glucose (mmol/L)	Cholesterol (mmol/L)	Triglyceride
1	HA	1	70	8	1		174	0	90	0.849	0	1	0	46	168	aripiprazole	300			17	20	46	83	55	4.52
2	YF	2	53	12	3	43	170	14.8789	100	0.909	0	0	0	18		olanzapine	750	1	4	15	16	35	66	53	5.2	3.65	0.58
3	YF	1	53	8	2	41	164	15.2439	59	0.747	0	0	0	34		quetiapine	15	0		18	19	42	79		4.6	3.68	0.85
4	HA	1	64	8	1	46	173	15.3697	80	0.833	0	0	0	19	384	olanzapine	600	0		23	23	43	89	49	4.71	4.27	0.89
5	HA	2	61	11	3	40	161	15.4315	84	0.955	0	0	0	31	6	clozapine	50	0							6.12	5.46	1.67
6	WJ	2	21	13	1	40	160	15.625	58	0.652	0	0	0	18		olanzapine	225	0		12	34	44	90		5.1	5.9	0.99
7	YF	1	57	6	1	46	171	15.7313	71	0.835	0	0	0	21		chlorpromazine	225	0		15	21	41	77	62	5.2
8	HA	1	47	5	1	50	178	15.7808	76	0.854	0	0	0	28	230	olanzapine	6000	0		23	32	60	115		4.28	5.21	0.45
9	HA	1	46	11	1	50	176	16.1415	60	0.75	0	0	0	15	6	clozapine	300	0		10	30	41	81	49		4.52	1.32
10	YF	2	52	15	1	43	163	16.1843	68	0.782	0	0	0	25		quetiapine	600	0		17	17	36	70	58		5.9	0.94
11	YF	1	56	6	1	45	164	16.7311	71	0.826	0	0	0	24		olanzapine	300	1	240	18	28	46	92		4.7	3.14	0.96
12	YF	2	31	12	1	48.5	170	16.782	66	0.786	0	0	0	29		ziprasidone	300	0		16	25	43	84	68	4.2	3.6	0.69
13	HA	1	69	8	1	42	158	16.8242	72	0.889	0	0	0	21	540	aripiprazole	200	0		17	30	53	100		4.17	4.6	0.67
14	HA	2	47	12	1	39	152	16.8802	53	0.726	0	0	0	20	9	Clozapine	325	0		23	22	44	89	67	4.97	4.14	0.98
15	HA	1	65	8	1	41	155	17.0656	64	0.865	0	0	0	35	80	olanzapine	300	0		16	22	42	80		3.84	3.9	0.59
16	HA	1	67	8	1	49.5	170	17.128	77	0.837	0	0	0	57	72	risperidone	240	0		12	19	38	69	59	4.58	5.81	0.79
17	HA	1	57	11	1	55.5	180	17.1296	64	0.762	0	1	0	24	40	clozapine	200	0		27	27	45	99		4.32	3.89	0.48
18	XZ	2	29	0	3	59	185	17.2389	86	1.132	0	0	0	25	24	aripiprazole	200	1	2	15	17	44	76	52	4	3.07	1.36
19	YF	1	49	8	1	51	172	17.239	70	0.778	0	0	0	19		risperidone	120	0		18	25	43	86	61		3.05	0.89
20	XZ	1	24	8	1	51	172	17.239	70	0.921	0	0	0	13		clozapine	75	0							4.24	2.87	0.51
21	HA	1	69	8	2	52	173	17.3745	91	0.892	1	1	0	39	106	risperidone	240	0		22	18	42	82	74	11.22
22	XZ	1	24	6	1	48	166	17.4191	63	0.788	0	0	0	14	12	clozapine	50	0		23	24	41	88		4.79	2.43	0.7
23	HA	1	21	8	1	60	185	17.531	78	0.897	0	0	0	13		alprazolam		0		12	34	56	102			3.81	1.01
24	YF	1	49	12	1	49	167	17.5697	67	0.817	0	0	0	15		olanzapine	300	0		14	22	43	79	82	5.3	3.9	0.65
25	WJ	1	34	15	1	56	178.5	17.5757	72	0.828	0	0	0	27		olanzapine	300	0		14	26	43	83	86	9.4	3.35	1.14
26	YF	1	57	15	1	52	172	17.5771	80	0.87	0	0	0	19		clozapine	200	0		13	25	36	74			3.99	0.91
27	XZ	1	40	12	1	45	160	17.5781	83	0.892	0	0	0	28	12	risperidone	240	0		14	32	45	91	83	4.72	3.79	1.34
28	HA	1	61	5	1	47	163	17.6898	66	0.767	0	0	0	17	275	risperidone	180	1	2	25	20	40	85	57	5.22	4.23	1.54
29	WJ	1	30	18	1	46	161	17.7462	70	0.787	0	0	0	25		clozapine	100	0		8	19	27	54	91
30	HA	2	58	11	1	45.5	160	17.7734	66	0.795	0	0	0	28	94	risperidone	240	1	4	23	27	55	105	49	4.59	4.76	0.56
31	HA	1	61	8	3	45	159	17.7999	75	0.882	0	0	0	29	7	Perphenazine	100	1	4	14	14	33	61		5.68	3.32	0.612
32	HA	1	55	16	1	48.5	165	17.8145	70	0.805	0	1	0	31	123	olanzapine	300	0		9	17	30	56	75	4.32	4.55	2.2
33	HA	2	55	11	1	44	157	17.8506	63	0.788	0	0	0	20	6	clozapine	75	1	6	16	32	51	99			6.34	1.31
34	HA	2	61	11	2	44	157	17.8506	67	0.838	1	0	0	32	146	risperidone	120	0		20	19	49	88	61		5.42	0.92
35	XZ	2	30	8	2	44	157	17.8506	86	1.075	0	0	0	20		olanzapine	150	0		17	22	53	92	49	5.3	4.67	0.74
36	HA	1	65	8	1	51	169	17.8565	73	0.785	0	0	0	29	312	risperidone	240	0		16	26	45	87		4.81	4.32	0.87
37	XZ	2	41	8	2	43	155	17.898	80	0.909	0	0	0	15		risperidone	120	0		22	39	52	113		4.67	3.94	1.21
38	YF	1	60	3	1	47	162	17.9089	67	0.77	0	0	0	36		olanzapine	150	0		11	30	48	89
39	HA	1	59	11	1	50	167	17.9282	72	0.847	0	0	0	35	71	risperidone	240	0		8	13	30	51	57		4.31	1
40	YF	1	54	8	1	54	173	18.0427	106	1.05	0	1	0	27		clozapine	50	0		10	20	26	56	71
41	YF	1	56	17	3	53	171	18.1252	75	0.833	0	0	0	41		clozapine	75	0		24	22	47	93	73	5.1	2.67	0.83
42	YF	1	55	9	1	47	161	18.132	71	0.816	0	0	0	37		aripiprazole	200	0		13	19	35	67	68	4.5	4.42	0.88
43	WJ	1	33	11	1	50	166	18.1449	69	0.841	0	0	0	23		quetiapine	262.5	0		14	28	34	76	71	4.8	4.73	0.87
44	HA	2	57	11	3	52	169	18.2066	77	0.828	0	0	0	30	90	Escitalopram oxalate		1	4	16	24	43	83		4.59	5.02	1.22
45	HA	1	56	11	1	52	169	18.2066	71	0.835	0	0	0	25	184	clozapine	300	0		18	20	55	93	60	6.16	4.98	0.91
46	XZ	1	55	8	1	51	167	18.2868	73	0.811	0	0	0	23		clozapine	50	0		26	14	49	89		4.32	5.7	1.17
47	WJ	2	57	10	1	44	155	18.3143	74	0.871	1	0	0	19		clozapine	25	0		12	18	32	62	88
48	WJ	1	19	13	1	53	170	18.3391	66	0.733	0	0	0	18		olanzapine	150	0		13	18	40	71		4.2	3.68	1.12
49	XZ	2	37	15	1	43	153	18.369	83	1.092	0	0	0	25	6	clozapine	25			22	20	37	79	77	5.38
50	WJ	1	39	8	1	49	163	18.4425	72	0.791	0	0	0	34		risperidone	300	1	4	12	18	31	61	51	4.4	4.57	1.31
51	HA	1	56	8	1	49	163	18.4425	102	0.99	0	0	0	26		olanzapine	300	0		18	22	53	93	50	4.59	4.64	0.84
52	HA	2	68	8	2	45	156	18.4911	77	0.963	0	0	0	38	148	aripiprazole	400	0		20	27	50	97	54	4.39	4.57	1.18
53	HA	1	65	5	1	45	156	18.4911	79	0.94	0	0	0	18	324	risperidone	120	0		11	26	38	75	47
54	YF	1	65	6	1	51	166	18.5078	69	0.793	0	0		25		clozapine	75			14	19	40	73	60	4.7	6.04	3.18
55	YF	1	46	9	1	55	172	18.5911	76	0.826	0	0	0	16		chlorpromazine	250	0		10	20	29	59	82	4.5	3.68	0.74
56	YF	1	50	9	1	52	167	18.6453	74	0.822	0	0	0	19		clozapine	325	0		17	10	24	51	69	4.9	4.72	0.49
57	XZ	1	55	5	2	49	162	18.6709	86	0.86	0	0	0	25	45	clozapine	100	0		17	18	36	71	66	5.79	2.83	0.89
58	YF	1	53	9	1	54	170	18.6851	80	0.86	0	1	0	40		quetiapine	75	1	4	22	33	52	107	75
59	XZ	1	42	15	1	60	179	18.726	94	0.989	0	0	0	32	36	clozapine	175	0		9	21	32	62	85	4.62	2.86	1.26
60	HA	1	51	8	1	51	165	18.7328	75	0.882	0	0	0	27	32	clozapine	50	0		15	35	54	104		4.51	4.52	1.33
61	YF	1	53	6	1	51	165	18.7328	78	0.857	0	0	0	26		clozapine	50	0		15	25	49	89		4.1	3.91	1.27
62	HA	1	53	7	1	50	163	18.8189	80	0.952	0	0	0	24	10	risperidone	240	1	2	16	44	65	125			4.19	0.59
63	WJ	2	29	16	2	47	158	18.8271	70	0.761	0	0	0	29		olanzapine	300	0		9	19	37	65	75
64	HA	1	57	16	1	54.5	170	18.8581	72	0.818	0	0	0	32		risperidone	360	0		14	18	26	58	77	5	6.1	1.83
65	HA	1	70	11	1	56	172	18.9292	69	0.812	0	0	0	27	300	olanzapine	300	0		7	12	25	44	67	4.63	4.02	1.48
66	YF	1	54	6	3	56	172	18.9292	75	0.798	1	0	0	25		risperidone	240	1	4	10	22	36	68	77
67	YF	2	57	12	2	48.5	160	18.9453	65	0.765	0	0	0	28		risperidone	240	1	4	14	24	40	78		4.8	5.43	0.69
68	HA	2	59	11	1	51	164	18.9619	83	0.922	0	0	0	20	346	risperidone	180	1	2	18	28	47	93		4.03	5.38	1.14
69	XZ	1	45	11	3	51	164	18.9619	83	1	0	0	0	44	10	clozapine	50	0		15	17	37	69	75
70	XZ	2	37	8	3	45	154	18.9745	80	0.964	0	0	0	27		alprazolam		0		24	26	51	101	50
71	HA	1	68	11	2	55	170	19.0311	70	0.824	0	0	0	30	335	olanzapine	600	0		11	34	49	94	45	4.3	3.33	0.5
72	XZ	1	51	8	2	55	170	19.0311	89	1.035	0	0	0	27	74	clozapine	100	0		14	22	38	74	51
73	XZ	2	41	8	3	44	152	19.0443	80	0.899	0	0	0	13		clozapine	100	1	2						4.06	2.93	0.94
74	YF	1	68	9	1	47	157	19.0677	73	0.83	0	0	0	22		olanzapine	300	0		18	23	44	85		4.5	4.17	0.61
75	HA	1	63	5	2	52	165	19.1001	71	0.845	0	0	0	45	42	olanzapine	300	0		19	45	49	113			2.85	0.62
76	HA	1	70	8	1	52	165	19.1001	79	0.919	0	1	0	47	307	aripiprazole	200	0		14	26	41	81			4.31	0.67
77	YF	2	60	12	4	46	155	19.1467	88	1	0	0	0	37		clozapine	25	0		14	23	44	81	65	4.7	4.42	0.73
78	XZ	1	45	12	1	58	174	19.1571	89	0.957	0	0	0	24	12	risperidone	240	0		19	20	47	86	87
79	WJ	2	26	15	1	45	153	19.2234	77	0.846	0	0	0	23		olanzapine	300	1	4	22	21	44	87	69
80	YF	2	50	15	1	45	153	19.2234	80	0.816	1	0	0	18		ziprasidone	225	0		11	14	37	62	82	7.1	4.14	1.47
81	XZ	1	27	7	1	59	175	19.2653	90	0.938	0	0	0	18	13	clozapine	100	0		29	32	51	112		6.78	3.48	1.66
82	HA	2	44	12	1	47	156	19.313	80	0.92	0	0	0	33	12	risperidone	360	1	6	13	22	46	81		5.52	4.49	1.12
83	XZ	1	46	9	1	52	164	19.3337	80	0.889	0	0	0	21	53	clozapine	75	0		17	16	34	67	68	4.69	4.17	1.8
84	HA	1	46	8	1	60	176	19.3698	87	0.935	0	0	0	23	111	clozapine	25	0		12	11	26	49	102
85	XZ	1	20	8	1	58	173	19.3792	73	0.88	0	0	0	15		clozapine	75	0		16	17	44	77	52	4	3.2	0.36
86	XZ	1	47	5	3	58	173	19.3792	66	0.868	0	0	0	22		clozapine	25			16	27	42	85		4.31	4.41	1.43
87	HA	1	56	6	1	51.5	163	19.3835	58	0.725	0	1	0	15	160	Flordipine		0		22	19	40	81		4.99	3.16	0.94
88	YF	2	64	12	1	51.5	163	19.3835	72	0.783	0	0	0	20		risperidone	120	0		19	24	42	85	61	4.2	5.01	1.62
89	WJ	2	27	7	2	51	162	19.433	78	0.867	0	0	0	25		olanzapine	450	0		11	19	31	61	81	5	3.12	1.32
90	HA	1	57	5	1	51	162	19.433	71	0.866	0	0	0	23	9	clozapine	350	0		8	37	54	99			4.65	0.66
91	XZ	1	45	11	1	53	165	19.4674	93	0.903	0	0	0	29	48	clozapine	50	0		19	20	46	85	70	4.5	4.23	2.5
92	XZ	1	36	7	1	53	165	19.4674	90	1.034	0	0	0	17	60	clozapine	200	0		19	26	58	103	88	5.21	3.25	0.76
93	XZ	1	30	6	1	61	177	19.4708	78	0.907	0	0	0	25	64	risperidone	120	1	4	21	29	49	99	62	3.93	3.65	0.52
94	WJ	1	26	9	1	55	168	19.487	74	0.831	0	0	0	22				0		9	16	22	47	83	4.8	4.01	0.89
95	WJ	1	22	16	1	55	168	19.487	77	0.865	0	0	0	18		clozapine	275	1	2	13	24	37	74	81	4.7	3.42	1.59
96	HA	1	59	8	1	59	174	19.4874	74	0.841	0	1	0	28	125	clozapine	100	0		17	27	48	92		4.02	3.62	0.77
97	YF	1	59	8	3	50	160	19.5312	77	0.875	0	0	0	26		aripiprazole	300	0		10	21	36	67	56		5.44	1.59
98	YF	2	48	15	1	58.5	173	19.5463	78	0.813	1	1	0	22		aripiprazole	600	0		8	12	26	46	99	4.2	3.62	0.56
99	XZ	2	24	8	2	52	163	19.5717	86	1.075	0	0	0	12		clozapine	25	0		28	27	54	109		4.32	2.76	0.89
100	HA	1	53	11	1	60	175	19.5918	71	0.845	0	0	0	22	170	risperidone	240	1	2	15	15	40	70	86
101	XZ	1	39	8	1	60	175	19.5918	89	1	0	0	0	25	96	clozapine	175	0		21	22	50	93	52
102	XZ	1	31	16	1	58	172	19.6052	96	1.079	0	0	0	27	6	clozapine	150	0		24	22	54	100	55
103	HA	2	68	5	4	56	169	19.6072	83	0.892	1	1	0	45	107	risperidone	360	1	4	18	28	50	96	53		4.06	1.32
104	WJ	2	46	9	1	49	158	19.6283	78	0.897	0	0	0	13		clozapine	250	0		24	21	46	91	70	4.4	3.27	0.86
105	HA	1	62	11	1	49	158	19.6283	67	0.838	0	0	0	34	10	risperidone	120	0		11	29	46	86
106	YF	1	52	6	1	61	176	19.6927	84	0.913	1	0	0	36		quetiapine	450	1	4	15	18	40	73	68		3.13	1.15
107	HA	1	32	7	1	55	167	19.721	110	1.028	0	0	0	22		clozapine	100	0		13	32	49	94	74		4.15	0.94
108	HA	1	60	8	1	55	167	19.721	73	0.913	0	0	0	21	122	olanzapine	300	0		14	25	39	78		4.02	4.54	1.53
109	XZ	1	50	8	1	55	167	19.721	95	0.969	0	0	0	32	68	clozapine	50	0		20	35	52	107		4.03	3.25	0.95
110	HA	1	60	11	2	57	170	19.7232	83	0.965	0	0	0	34	323	olanzapine	450	0		14	27	46	87		4.57
111	YF	1	49		1	57	170	19.7232	76	0.835	0	1	0	24		clozapine	50	0		12	13	34	59	63		4.56	2.54
112	XZ	1	23	6	1	57	170	19.7232	70	0.875	0	0	0	15	24	clozapine	50	0		14	27	34	75		5.23	4.17	0.32
113	YF	2	38	12	2	50.5	160	19.7266	66	0.776	0	0	0	19	6	aripiprazole	600	1	2	22	29	55	106	48	4.9	3.63	0.75
114	HA	1	41	5	2	52	162	19.8141	68	0.85	0	0	0	39	6	quetiapine	75	0		21	17	52	90	52	4.22
115	XZ	2	40	5	1	54	165	19.8347	80	0.899	0	0	0	20	153	risperidone	120								3.97
116	YF	1	27	12	1	58	171	19.8352	87	0.946	0	0	0	17		aripiprazole	15	1	2	14	11	29	54	78		4.04	3.42
117	YF	2	37	12	1	46.5	153	19.8642	74	0.881	0	0	0	23		aripiprazole	600	1	4	10	10	22	42	66		6.84	2.66
118	HA	1	41	8	1	49	157	19.8791	88	0.917	0	0	0	18	36	clozapine	100	0		13	33	43	89	51		3.79	0.86
119	XZ	2	38	6	2	49	157	19.8791	93	0.969	0	0	0	34		clozapine	50	0		14	32	47	93	51	4.72	5.49
120	XZ	2	35	8	1	49	157	19.8791	86	0.966	0	0	0	33	6					14	15	26	55	46	4.56
121	HA	1	44	8	1	57.5	170	19.8962	83	0.922	0	0	0	24		clozapine	100	0		11	18	38	67		4.61	3.38	1.02
122	XZ	2	47	8	3	48	155	19.9792	76	0.95	0	0	0	27	240	sulpiride	75	0		23	33	64	120		4.35
123	HA	1	64	5	1	50	158	20.0288	71	0.845	0	0	0	14	360	olanzapine	600	1	4	17	29	46	92			4.15	1.13
124	HA	2	29	15	2	50	158	20.0288			0	0	0	18	6	olanzapine	600	0		11	16	29	56	85	4.71	4.47	0.64
125	WJ	1	18	11	1	65	180	20.0617	73	0.82	0	0	0	18		risperidone	120	0		18	31	42	91
126	XZ	1	36	8	1	58	170	20.0692	80	1.039	0	0	0	16		clozapine	25	0		11	36	44	91		5.04	3.63	0.82
127	XZ	1	49	8	1	58	170	20.0692	73	0.913	0	0	0	29		risperidone	120	0		17	34	54	105		4.92	2.93	0.91
128	HA	2	65	11	4	51	159	20.1733	83	0.806	0	1	0	28	205	aripiprazole	400	0		19	22	46	87		4.17	6.72	0.58
129	HA	1	66	6	2	51	159	20.1733	74	0.851	0	0	0	38	24	risperidone	180	0		9	21	34	64	51	5.47	4.8	1.37
130	YF	1	61	6	2	51	159	20.1733	78	0.886	0	0	0	34		amisulpride	150	0		17	31	43	91	69	4.6
131	XZ	1	37	9	1	59	171	20.1771	76	0.854	0	0	0	26		risperidone	240	0		12	22	39	73	83	5.15	3.3	0.95
132	YF	1	50	9	3	57	168	20.1956	83	0.902	0	0	0	23		clozapine	100	0		18	19	35	72	53		3.21	1.1
133	XZ	1	36	7	1	57	168	20.1956	84	0.857	0	0	0	16	52	clozapine	50	0		18	28	41	87	47	5.22	2.76	0.8
134	XZ	1	51	8	2	57	168	20.1956	86	1	0	0	0	34	40	clozapine	100	1	4	19	33	38	90	54	4.25	3.89	1.32
135	YF	1	49	6	1	55	165	20.202	75	1.25	0	0	0	19		olanzapine	300	0		14	17	35	66	75	4.7	4.38	0.83
136	YF	1	59	15	3	55	165	20.202	69	0.784	0	0		29		olanzapine	75	0		9	21	36	66		4.7	4.34	1.43
137	YF	1	60	9	1	62	175	20.2449	77	0.819	0	0	0	22		clozapine	275	0						60
138	XZ	1	26	8	1	62	175	20.2449	88	0.926	0	0	0	17	68	risperidone	120	0		13	16	23	52	80	4.24	3.08	0.52
139	WJ	1	42	11	2	60	172	20.2812	82	0.882	0	0	0	31		risperidone	300	1	4	13	22	43	78		4.3	4.32	2.09
140	HA	1	35	8	2	60	172	20.2812	80	0.889	0	0	0	23		amisulpride	300	0		14	41	53	108	50		4.35	0.79
141	XZ	1	38	6	1	60	172	20.2812	83	1	0	0	0	18	12	clozapine	150	0		9	18	45	72	70
142	YF	1	60	9	1	65	179	20.2865	78	0.796	1	0	0	27		risperidone	300	1	4	24	12	36	72	63	4.1	3.23	0.89
143	WJ	1	41	11	1	58	169	20.3074	78	0.907	0	0	0	25		clozapine	50	0		13	20	36	69	71	5	4.11	0.79
144	XZ	1	61	10	3	52	160	20.3125	89	1.072	0	0	0	35	45	sulpiride	75	0							4.72	3.7	1.26
145	XZ	2	34	8	2	54	163	20.3244	80	0.93	0	0	0	22		clozapine	75	0		15	22	40	77	47	4.58	3.1	1.32
146	XZ	1	55	8	3	54	163	20.3244	73	0.88	0	0	0	44		Perphenazine	40	0		13	25	39	77		4.36	3.44	2
147	YF	1	45	15	1	63	176	20.3383	80	0.8	0	0	0	25		clozapine	100	0		13	32	66	111		5.1	5.39	1.78
148	HA	1	56	11	1	59	170	20.4152	90	0.918	0	0	0	20	372	olanzapine	600	0		17	23	44	84	51	4.6	3.52	0.71
149	HA	1	63	15	1	57	167	20.4382	85	0.944	0	1	0	30	55	clozapine	250	1	4	14	18	33	65	70		3.93	1.99
150	HA	2	66	8	2	53	161	20.4467	89	1.047	0	0	0	27	15	amisulpride	600	1	6	18	27	50	95	47		3.98	1.2
151	WJ	2	28	16	2	55	164	20.4491	84	0.875	0	0	0	23		olanzapine	75	0		15	25	32	72	71
152	HA	1	67	5	1	65	178	20.5151	87	0.956	0	1	0	36	364	olanzapine	150	0		9	24	34	67			5.25	1.89
153	XZ	1	50	8	3	60	171	20.5191	91	1.011	0	0	0	30	63	clozapine	50	0		25	14	32	71	57	4.45	4.06	1.19
154	XZ	1	54	11	2	68	182	20.5289	90	1	0	0	0	45	6	risperidone	60	0		13	15	35	63	74	5.23	4.56	2.75
155	WJ	2	36	8	1	50	156	20.5457	66	0.584	0	0	0	14	6	aripiprazole	300	0		18	15	39	72		4.5	5.87	3.47
156	XZ	2	50	4	2	50	156	20.5457	83	0.892	0	1	0	28	12			0		25	24	36	85		2.9	3.39	0.9
157	XZ	2	50	1	5	50	156	20.5457	86	0.966	0	0	0	30				0							5.32	3.79	1.35
158	HA	1	53	8	2	58	168	20.5499	79	0.898	0	0	0	34	162	risperidone	300	0		23	30	50	103	48		4.77	1.32
159	XZ	1	32	9	1	58	168	20.5499	76	0.884	0	0	0	23		clozapine	50			17	12	40	69	63	4.62	3.72	0.83
160	HA	2	56	12	2	52	159	20.5688	70	0.805	0	0	0	33	6	risperidone	420	0		17	26	51	94	53	5.8	4.36	0.89
161	XZ	2	43	11	3	52	159	20.5688	80	0.899	0	0	0	31		risperidone	60	0		10	15	31	56	56	3.87	5.46	0.89
162	WJ	1	34	12	2	56	165	20.5693	75	0.843	0	0	0	17		alprazolam		0		12	20	29	61	86
163	XZ	1	44	15	1	56	165	20.5693	73	0.913	0	0	0	37		risperidone	120	0		13	12	38	63	83	4.73	3.43	0.89
164	WJ	1	23	12	1	63	175	20.5714	83	0.922	0	0	0	19		olanzapine	450	1	2	13	22	30	65	67	4	3.09	0.99
165	HA	2	65	11	2	49.5	155	20.6035	90	1.023	1	0	0	32	49	risperidone	360	0		12	22	39	73	52		6.8	1.32
166	XZ	1	30	8	1	61	172	20.6193	93	1.045	0	0	0	22	10	clozapine	100	0		15	20	51	86	50
167	WJ	2	25	14	1	57	166	20.6852	72	0.742	0	0	0	18		olanzapine	150	0		14	10	28	52	76
168	YF	1	40		1	57	166	20.6852	75	0.798	0	0	0	22		risperidone	120	0		13	16	39	68	64		3.66	1.32
169	YF	1	63	15	3	51	157	20.6905	70	0.805	0	1	0	42		aripiprazole	200	0		13	32	62	107
170	XZ	2	46	0	3	51	157	20.6905	89	1	0	0	0	26		aripiprazole	200	0		20	33	60	113		4.72	4.3	0.44
171	XZ	2	47	8	1	51	157	20.6905	76	0.817	0	0	0	21	360	sulpiride	75			9	21	39	69	50	4.32
172	YF	1	55	15	2	55	163	20.7008	72	0.847	0	0	0	27		clozapine	375	0		11	22	37	70	67		3.73	1.36
173	HA	1	55	15	1	62	173	20.7157	87	0.935	0	0	0	25	24	clozapine	200	0		12	14	33	59		4.72	3.9	1
174	HA	1	51	11	1	68	181	20.7564	99	0.99	1	1	1	25		quetiapine	300	0		10	22	32	64			4.9	1.26
175	YF	1	61	6	1	60	170	20.7612	95	0.905	0	0	0	30		clozapine	100	1	10	15	26	49	90	56	5.3	4.05	1.1
176	YF	1	62	3	1	60	170	20.7612	79	0.814	0	1		24		olanzapine	300	0		14	24	43	81	69		3.67	1.31
177	XZ	1	34	7	1	60	170	20.7612	96	0.96	0	0	0	30	15	risperidone	240	0		16	25	49	90	52
178	XZ	1	33	12	1	60	170	20.7612	69	0.863	0	0	0	19		risperidone	120	0		17	28	45	90	45	4.17	3.27	1.51
179	YF	1	67	9		58	167	20.7967	88	0.907	1	0	0	17		ziprasidone	75	0		9	18	30	57	49		4.1	1.1
180	XZ	1	30	17	1	58	167	20.7967	69	0.873	0	0	0	17		clozapine	100	0		12	25	44	81	65	5.11	3.25	0.44
181	HA	2	52	15	1	52	158	20.83	88	0.978	1	0	0	19	10	risperidone	360	1		15	22	42	79	66	4.62	3.83	0.45
182	YF	2	62	12	3	54	161	20.8325	80	0.889	0	1	0	27		Perphenazine	40	1	2	11	9	25	45	85	4	3.9	0.64
183	XZ	2	36	0	2	54	161	20.8325	80	0.93	0	0	0	16		clozapine	75	1	2						4.99	3.67	0.89
184	WJ	1	22	11	1	64	175	20.898	80	0.909	0	0	0	17		clozapine	350	0		12	10	28	50	90	4.6	3.31	1.17
185	HA	1	31	12	1	70	183	20.9024	90	0.9	0	1	0	19		clozapine	175	1	4	11	13	34	58	63		4.13	0.67
186	WJ	2	31	8	1	57	165	20.9366	81	0.88	0	0	0	22		risperidone	60	0		13	26	42	81	51	4.7	4.21	1.26
187	YF	1	66	9	1	55	162	20.9572	77	0.865	0	0	0	21		quetiapine	225	0		12	29	38	79	66
188	YF	1	55	12	3	62	172	20.9573	81	0.853	0	0	0	19		clozapine	100	1	4	14	38	53	105	62	4.3	5.54	1.76
189	YF	1	67	6	1	62	172	20.9573	81	0.853	0	1	0	19		Perphenazine	160	1	4	16	17	35	68	56	4.1
190	HA	1	63	8	2	53	159	20.9644	80	0.941	0	0	0	20		olanzapine	600	0		15	18	43	76			4.4	1.01
191	HA	1	66	11	2	60	169	21.0077	88	0.957	1	1	1	35	6	risperidone	240	0		20	14	36	70		3.99
192	YF	1	31	12	1	60	169	21.0077	76	0.894	0	0	0	22		quetiapine	375	0		15	20	38	73	89	4.2	4.84	0.83
193	XZ	2	41	5	2	60	169	21.0077	90	0.968	0	0	0	26		sulpiride	37.5	0		10	9	33	52	58
194	HA	1	55	8	1	58	166	21.048	86	0.966	0	0	0	16	360	clozapine	225	0		11	29	44	84		5.28	4.12	1.02
195	YF	1	62	11	1	58	166	21.048	77	0.856	0	0	0	19		risperidone	240	1	4	19	22	40	81		5	4.14	0.66
196	XZ	1	28	8	1	58	166	21.048	73	0.961	0	0	0	14		aripiprazole	200	0		11	30	39	80		5.08	3.06	1.03
197	XZ	1	23	11	1	63	173	21.0498	88	0.936	0	0	0	18		olanzapine	150	0		15	10	33	58	79	4.28	3.74	1.24
198	HA	1	31	11	1	64.5	175	21.0612	77	0.917	0	0	0	28	6	clozapine	200	0		18	19	42	79	50	4.34	4.76	1.18
199	XZ	1	36	14	1	66	177	21.0667	77	0.928	0	0	0	22	33	clozapine	25	0		8	23	40	71	74	4.65	2.75	1.14
200	XZ	2	64	11	3	50	154	21.0828	90	1.034	0	0	0	49	31					30	28	48	106		5.1
201	WJ	2	47	8	2	54	160	21.0938	84	0.857	0	0	0	31		olanzapine	8250	0		22	18	39	79	72	5.7	4.18	0.51
202	XZ	1	32	9	1	54	160	21.0938	73	0.88	0	0	0	27		risperidone	240	0		12	14	36	62	60	4.55	3.19	0.49
203	HA	1	70	8	1	52	157	21.0962	78	0.963	0	0	0	29	396	sulpiride	150	0		14	21	35	70	61		3.83	0.36
204	HA	1	61	10	3	61	170	21.1073	92	0.911	1	0	0	53	110	aripiprazole	100	0		16	28	51	95	55	6.06	4.85	1.62
205	YF	2	65	9	1	47.5	150	21.1111	80	0.87	0	0	0	14		clozapine	100	0		15	38	50	103		6.1	3.49	0.97
206	WJ	1	43	15	1	64	174	21.1389	87	0.879	0	0	0	23	6	aripiprazole	300	0		18	16	39	73	53	4.7	3.88	0.86
207	XZ	1	32	8	1	64	174	21.1389	90	0.968	0	0	0	24	10	risperidone	90	1	2	14	27	48	89	81	4.71	3.07	1.49
208	HA	1	28	8	1	59	167	21.1553	82	0.901	0	0	0	19	6	clozapine	200	0		15	13	26	54	51
209	WJ	1	42	7	1	62	171	21.2031	87	0.935	0	0	0	13		quetiapine	562.5	0		14	24	44	82	73	4.5	3.56	1.38
210	WJ	2	17	11	1	62	171	21.2031	69	0.812	0	0	0	16	6	aripiprazole	300	0		17	12	26	55		4.4	4.59	0.95
211	WJ	2	53	5	4	49	152	21.2084	89	0.957	0	1	0	26		risperidone	120	1	4	24	29	46	99
212	YF	2	66	12	4	49	152	21.2084	82	0.882	0	0	0	23		quetiapine	300	0		15	24	50	89		4.8	4.98	1.61
213	HA	1	53	15	3	68	179	21.2228	86	0.869	0	0	0	31	155	olanzapine	600	0		18	16	25	59	72	4.4	3.12	0.78
214	XZ	1	21	9	1	68	179	21.2228	76	0.854	0	0	0	15	11	risperidone	60	0		10	15	31	56	59	3.72	3.74	1.19
215	WJ	1	33	9	1	65	175	21.2245	85	0.934	0	0	0	19		risperidone	180	0		17	20	35	72	53
216	WJ	1	26	11	1	65	175	21.2245	79	0.878	0	0	0	18		olanzapine	450	0		19	17	34	70	65	4.3	3.6	1.75
217	HA	1	69	5	1	65	175	21.2245	86	0.945	0	0	0	38	16	clozapine	100	0		10	28	40	78	53	5.49
218	HA	2	56	8	3	51	155	21.2279	72	0.889	0	0	0	23	89	risperidone	360	0								4.12	1.31
219	HA	2	55	11	1	51	155	21.2279	87	0.967	0	0	0	25	312	aripiprazole	400	0		12	18	31	61	63	4.25	3.19	2.07
220	XZ	1	46	9	1	51	155	21.2279	84	0.875	0	0	0	18	6	clozapine	75	0		14	34	45	93	70	4	3.48	0.74
221	WJ	1	30	12	1	60	168	21.2585	86	0.935	0	0	0	19		clozapine	75	0		13	23	37	73	67	5.5	2.47	4.2
222	HA	1	55	9	1	60	168	21.2585	91	0.958	1	0	0	26	162	clozapine	150	0		26	17	43	86	93	3.81	3.73	0.41
223	HA	1	67	8	1	60	168	21.2585	84	0.875	1	0	0	21	20	risperidone	120	1	6	13	20	41	74	78		3.54	0.71
224	HA	1	59	11	3	60	168	21.2585	80	0.941	1	0	0	20	143	olanzapine	300	0		12	14	28	54
225	HA	1	25	12	1	60	168	21.2585	80	0.889	0	0	0	21	9	amisulpride	150	0		8	13	25	46		4.48	4.13	0.81
226	YF	1	62	12	1	60	168	21.2585	79	0.888	0	0	0	23		clozapine	75	0		12	23	42	77	51	4.1	3.37	0.55
227	YF	1	63	12	3	60	168	21.2585	76	0.844	0	0	0	32		clozapine	100	1	4	10	23	38	71	57
228	XZ	1	47	11	1	60	168	21.2585	83	0.965	0	0	0	25	44	risperidone	120	0		18	20	45	83	66
229	WJ	2	46	16	3	58	165	21.3039	87	0.946	1	0	0	31		risperidone	120	0		10	25	32	67	78	7.9	5.89	2.9
230	YF	2	52	16	3	58	165	21.3039	82	0.82	0	0	0	29		clozapine	250	1	20	10	18	31	59	63	3.8	3.68	0.92
231	HA	2	70	9	1	48	150	21.3333	87	0.935	1	1	0	19	390	risperidone	360	1	4	28	27	54	109	44		3.41	1.37
232	XZ	2	49	8	1	48	150	21.3333	80	1	0	0	0	19	360	risperidone	120			18	35	59	112	52	5.78
233	XZ	2	26	8	2	48	150	21.3333	80	1.212	0	0	0	23	36	quetiapine fumarate	75			8	17	31	56	65	5.74
234	HA	1	55	5	1	56	162	21.3382	67	0.798	1	0	0	21	300	amisulpride	150	0		14	26	42	82			2.89	0.71
235	XZ	1	50	9	3	56	162	21.3382	53	0.596	0	0	0	34	55	clozapine	50	0		18	20	42	80	52	4.68	2.47	0.96
236	HA	2	62	8	3	61	169	21.3578	100	0.935	0	0	0	39	118	aripiprazole	100	1	3	22	26	45	93	53	4.29	4.46	1.08
237	HA	2	59	8	1	50	153	21.3593	92	0.989	1	0	0	17	8	aripiprazole	600	0		10	15	31	56	65		5.47	0.83
238	HA	1	70	8	1	59	166	21.4109	90	1	0	1	0	50	121	Perphenazine	120	0		13	9	31	53	85		5.89	1.36
239	HA	1	70	11	2	59	166	21.4109	90	1	1	1	1	63	84	olanzapine	600	0		15	22	40	77	54	6.33	4.5	0.6
240	XZ	1	45	8	2	59	166	21.4109	100	1.163	0	0	0	30	35	aripiprazole	200	0		28	25	41	94	63	4.63	2.43	0.81
241	HA	1	66	11	1	62	170	21.4533	82	0.965	0	0	0	13	238	olanzapine	600	0		15	22	37	74	52	4.87	3.65	0.76
242	XZ	2	29	6	1	62	170	21.4533	89	1.072	0	0	0	17		sulpiride	75	0		21	24	53	98	49	4.91	4.5	0.74
243	YF	1	68	8	1	55	160	21.4844	71	0.845	0	0	0	21		olanzapine	300			15	20	32	67	68	4.8	4.58	0.53
244	HA	1	70	8	1	53	157	21.5019	75	0.893	0	1	0	40	360	risperidone	120	0		17	25	42	84	52		5.15	1.7
245	HA	2	59	11	3	53	157	21.5019	77	0.819	0	0	0	43	6	risperidone	360	0		15	21	44	80	69	6.33	5.68	0.61
246	HA	2	49	11	1	51	154	21.5045	72	0.847	0	1	0	21	183	clozapine	75	0		14	20	39	73	63		5.02	1.23
247	XZ	2	25	8	1	69	179	21.5349	82	0.911	0	0	0	20		clozapine	150	0		16	11	36	63	49	4.85	2.92	0.76
248	HA	1	47	11	1	66	175	21.551	83	0.874	0	0	0	26	63	risperidone	240	0		12	21	41	74		4.96	4.22	1
249	HA	2	44	15	1	56	161	21.6041	75	0.798	0	0	0	20	271	risperidone	360	1	4	13	17	37	67	103	4.71	4.17	0.7
250	HA	1	58	5	3	67	176	21.6296	86	0.956	1	0	0	23	223	clozapine	37.5	0		12	18	41	71	60	4.52
251	HA	1	39	8	1	64	172	21.6333	84	0.903	0	0	0	23	16	olanzapine	600	1	2	10	13	31	54	60	4.5	4.06	2.42
252	YF	1	65	9	1	64	172	21.6333	96	0.95	0	0		27		quetiapine	150	0		11	23	38	72	74		5.41	2.16
253	YF	1	44	15	3	64	172	21.6333	77	0.865	0	0	0	27		clozapine	75	0		18	21	43	82	79
254	XZ	1	42	8	1	59	165	21.6713	103	1.03	0	0	0	27		clozapine	125	0		12	23	40	75	72
255	YF	1	41	5	2	68	177	21.7051	84	0.848	0	0	0	33		risperidone	240	1	2	9	29	35	73	75
256	HA	1	48	8	1	62	169	21.7079	81	0.92	0	0	0	21	18	olanzapine	2250	1	4	13	27	46	86
257	YF	2	59	12	3	62	169	21.7079	78	0.867	0	0	0	15		clozapine	300	1	20	16	23	44	83		4.4	4.28	1.29
258	HA	1	46	5	1	66.5	175	21.7143	84	0.894	0	0	0	16	23	clozapine	250	1	4	20	17	39	76	64	4.41	3.25	0.93
259	HA	1	54	5	1	65	173	21.7181	92	0.958	1	1	0	20	300	risperidone	360	0		17	24	39	80	67	4.58	439	0.97
260	HA	1	50	15	2	65	173	21.7181	82	0.891	0	0	0	34	8			0		23	18	42	83	89	3.93	4.46	1.57
261	YF	1	39	12	1	65	173	21.7181	77	0.875	0	0		18		clozapine	25	1	4	11	24	30	65	61
262	HA	2	58	11	1	57	162	21.7193	92	1.122	1	0	0	22	95	sulpiride	300	0		19	17	32	68	83	3.43	3.92	1.17
263	HA	1	56	8	4	55	159	21.7555	91	1.022	0	0	0	39	11	risperidone	120	1	4	15	39	53	107		4.39	2.87	1.02
264	XZ	2	40	10	2	55	159	21.7555	93	1	0	0	0	40		clozapine	5	0							4.87	3.33	0.6
265	HA	1	65	8	1	60	166	21.7738	82	0.943	0	0	0	22	118	risperidone	240	0		13	33	41	87	53		3.85	0.54
266	YF	1	57	9	3	60	166	21.7738	70	0.778	0	0	0	43	6	olanzapine	150	1	4	27	25	54	106	87	4.8	4.65	1.05
267	WJ	2	54	12	2	49	150	21.7778	78	0.848	0	0	0	29		risperidone	240	1	4	19	22	30	71	74
268	XZ	2	50	4	2	49	150	21.7778	100	0.971	0	0	0	13		clozapine	50	0		26	25	45	96		4.84	2.6	2.47
269	XZ	2	44	3	2	49	150	21.7778	100	0.943	0	0	0	37		clozapine	50	0		19	19	43	81		4.24	4.24	1.71
270	YF	2	47	12	1	51	153	21.7865	74	0.822	0	1	0	14		clozapine	150	0		11	25	44	80	65	4.8	5.08	1.24
271	XZ	2	48	2	2	51	153	21.7865	86	0.966	0	0	0	32		olanzapine	150	0		20	42	52	114		4.16	4.4	0.71
272	HA	1	61	11	1	61.5	168	21.79	75	1.042	0	1	0	24	224	risperidone	360	0		17	27	51	95		5.12	4.19	1.17
273	YF	1	45	9	1	70	179	21.847	90	0.891	0	0	0	23		aripiprazole	500	1	4	13	19	34	66	59		4.29	2.41
274	XZ	1	24	9	1	56	160	21.875	87	1.048	0	0	0	20		clozapine	75	0		16	24	44	84	52	5.22	3.66	1.34
275	YF	1	58	12	1	64	171	21.8871	73	0.709	0	0	0	25		clozapine	75	1		14	24	41	79	56	4	3.53	1.77
276	XZ	2	28	5	1	54	157	21.9076	86	0.925	0	0	0	17	122	sulpiride	37.5	0		14	38	50	102	49	3.41
277	YF	1	61		2	59	164	21.9363	81	0.844	0	0	0	35		olanzapine	150	0		14	21	45	80	48		4.42	1.46
278	HA	2	58	8	2	43	140	21.9388	72	0.878	0	1	0	41	6	Perphenazine	160	0		14	44	63	121		7.75	5.58	0.61
279	HA	1	44	8	1	68	176	21.9525	87	0.946	1	0	0	27	201	clozapine	200	0		17	23	37	77	62		4.29	1.02
280	YF	1	61	11	1	62	168	21.9671	79	0.888	0	0	0	19		aripiprazole	200	0		21	25	39	85	54	4.1	3.77	0.77
281	WJ	1	21	14	1	65	172	21.9713	79	0.859	0	0	0	19		olanzapine	600	0		24	41	51	116	65	4.6	3.82	1
282	YF	1	34	16	1	65	172	21.9713	83	0.847	0	0	0	17		clozapine	75	0		20	25	45	90	81	3.8	3.58	0.74
283	WJ	2	49	15	2	57	161	21.9899	83	0.976	1	0	0	23		clozapine	250	0		28	27	43	98	63	10.1	4.11	2.12
284	WJ	2	28	14	3	57	161	21.9899	78	0.821	0	0	0	20		risperidone	240	0		9	12	25	46	78	5.3	5.14	0.6
285	HA	2	55	11	1	77	161	29.7056	98	1.14	1	1	0	22	84	risperidone	360	1		17	29	38	84	67	4.38	3.04	0.92
286	WJ	2	26	11	1	55	158	22.0317	84	0.848	0	0	0	21		quetiapine	450	0		14	16	31	61	85	4.7	4.57	1.17
287	XZ	2	42	8	4	55	158	22.0317	84	1	0	0	0	28	36	risperidone	120			20	24	42	86	53	4.95
288	WJ	2	17	9	1	60	165	22.0386	88	0.917	0	0	0	17		olanzapine	450	0		14	30	42	86		3.9	3.45	1.13
289	HA	1	55	4	3	60	165	22.0386	78	0.907	0	0	0	24	74	aripiprazole	200	1	4	15	18	37	70	49		4.54	1.43
290	HA	1	60	11	1	60	165	22.0386	80	0.92	1	0	0	14	24	risperidone	240	1	2	14	30	37	81	63		3.82	1.28
291	YF	1	51	9	1	60	165	22.0386	83	0.83	0	0	0	18		risperidone	120	0		14	17	39	70	78		4.78	1.18
292	HA	2	34	9	1	53	155	22.0604	80	1	0	0	0	19	6	amisulpride	450	0		18	18	45	81			6.47	0.98
293	HA	1	70	8	1	61	166	22.1367	81	0.942	0	0	0	39	383	risperidone	360	1	2	15	26	37	78			4.41	0.68
294	HA	1	50	11	1	56	159	22.151	82	0.943	0	0	0	24	41	clozapine	200	0		14	28	37	79	60		3.81	0.83
295	HA	2	54	8	1	56	159	22.151	91	0.968	1	1	0	20	12	clozapine	200	0		14	22	36	72		4.24	4.45	1.58
296	HA	2	63	15	4	56	159	22.151	90	0.978	0	1	0	21	8	olanzapine	9000	0		18	16	33	67	67		5.43	1.62
297	XZ	2	28	8	2	56	159	22.151	80	1	0	0	0	17		clozapine	50	1	2	16	21	35	72	48	4.32	2.85	1.44
298	HA	1	55	11	1	68	175	22.2041	100	1.042	0	1	0	17	70	risperidone	360	0		8	11	32	51		5.94	4.99	3.76
299	WJ	2	24	13	1	59	163	22.2063	89	1.047	0	0	0	17		olanzapine	300	0		13	20	38	71	71
300	HA	1	48	8	1	62	167	22.231	81	0.88	0	0	0	24	27	clozapine	0.2	0		18	32	46	96	63	5.15	4.04	1.4
301	XZ	1	55	9	1	62	167	22.231	73	0.82	0	0	0	25		Perphenazine	80	0		14	29	43	86		9.04	4.39	1.3
302	XZ	2	34	11	3	62	167	22.231	83	0.892	0	0	0	22	44	risperidone	60	0		11	21	40	72	46	4.66
303	WJ	2	55	8	1	57	160	22.2656	88	0.936	1	0	0	16		clozapine	25	1	2	15	24	42	81		13.8	3.2	5.92
304	WJ	1	29	15	1	69	176	22.2753	86	0.878	0	0	0	29		clozapine	125	0		13	29	40	82	77	5.3	5.74	1
305	HA	1	60	10	1	58.5	162	22.2908	81	0.964	0	1	0	33	23	olanzapine	600	0		25	23	49	97	51	4.92	3.41	1.67
306	XZ	1	50	4	1	60	164	22.3081	73	0.913	0	0	0	20		clozapine	50	0		16	21	43	80	54	4.73	3.59	0.92
307	XZ	1	51	12	1	60	164	22.3081	76	0.95	0	0	0	20		olanzapine	150	0		13	16	32	61	70	4.7	3.38	1.73
308	HA	2	54	11	3	55	157	22.3133	73	0.811	0	0	0	22	192	risperidone	180	1	2	19	22	46	87	72	4.93	6.22	1.07
309	HA	2	46	11	2	55	157	22.3133	80	0.909	0	0	0	27	24	sulpiride	225	0		10	24	43	77	82		4.83	2.17
310	YF	1	51	6	1	63	168	22.3214	89	0.89	0	0	0	21		clozapine	200	0		13	9	30	52		5.7	5.31	2.73
311	HA	1	70	4	2	67	173	22.3863	82	0.882	0	1	0	21	408	risperidone	120	0		12	26	39	77	51
312	WJ	1	19	13	1	75	183	22.3954	90	0.882	0	0	0	18		risperidone	120	1	1	9	10	18	37		4.9	3.69	0.65
313	HA	1	47	9	1	75	183	22.3954	83	0.847	1	0	0	15	122	risperidone	360	1	4	10	14	29	53	78	6.66	4.34	1.86
314	XZ	1	48	8	1	61	165	22.4059	93	1	0	1	0	28	108	clozapine	100	0		19	21	41	81	53
315	XZ	2	29	8	2	61	165	22.4059	86	0.925	0	0	0	15	12	sulpiride	75	0		17	19	35	71	70
316	WJ	2	35	13	3	56	158	22.4323	92	1.022	0	0	0	20	6	aripiprazole	100	0		16	12	34	62	83	4.3	3.64	1.97
317	WJ	1	58	15	1	68	174	22.46	85	0.859	0	0	0	28		clozapine	350	0		17	13	29	59	66	5.3	3.94	1.85
318	XZ	1	30	10	1	68	174	22.46	103	1.03	0	0	0	20	6	clozapine	200	0		25	23	46	94	55
319	WJ	1	51	16	1	59	162	22.4813	83	0.865	1	1	0	26		clozapine	50	0		9	32	49	90
320	HA	1	63	11	1	59	162	22.4813	82	0.872	0	0	0	20	344	aripiprazole	400	1	6	18	24	41	83		4.96	4.37	0.89
321	YF	1	50	3	1	59	162	22.4813	78	0.813	0	0	0	13		clozapine	50	0		16	25	46	87	53	5.1	4.39	1.77
322	WJ	2	48	8	3	85	170	29.4118	89	0.947	1	0	0	19		olanzapine	9000	1	4	17	27	40	84		4.9	3.25	1.1
323	WJ	1	55	6	1	65	170	22.4913	87	0.935	0	1	0	36		risperidone	120	0		24	31	38	93	51	5	3.93	1.68
324	HA	1	64	8	2	65	170	22.4913	82	0.901	0	0	1	26	337	risperidone	360	1	6	16	24	46	86		4.93	4.28	1.1
325	YF	1	32	9	1	65	170	22.4913	78	0.821	0	1	0	18		clozapine	125	0		15	21	34	70
326	XZ	1	44	6	1	65	170	22.4913	100	1.042	0	0	0	21	12	risperidone	240	0		11	20	34	65	64
327	WJ	2	49	15	1	52	152	22.5069	73	0.83	0	0	0	17		clozapine	200	0		16	16	41	73	77	5.2	3.89	1.12
328	HA	1	26	12	3	48	146	22.5183	76	0.844	0	0	0	25	6	risperidone	300	1	4	9	18	37	64	67	4.62	4.54	1.38
329	HA	1	69	8	1	57	159	22.5466	77	0.895	0	0	0	24	123	olanzapine	300	0		13	17	37	67	66	4.69	5.08	0.64
330	XZ	1	48	5	1	60	163	22.5827	93	1.081	0	0	0	38	36	sulpiride	37.5	0		14	28	47	89		4.25	3.89	1.32
331	HA	1	50	15	1	63	167	22.5896	84	0.903	0	0	0	31	177	olanzapine	600	0		13	20	30	63			4.22	11.1
332	XZ	2	40	15	1	63	167	22.5896	83	0.83	0	0	0	20	54	sulpiride	71.25	0		7	18	25	50	86	3.99
333	XZ	1	45	8	1	67	172	22.6474	100	1.075	0	0	0	22	114	clozapine	125	0		12	25	39	76	53	4.18	3.66	0.5
334	HA	1	68	11	2	58	160	22.6562	90	0.978	0	0	0	43	70	risperidone	120	1	2	10	21	34	65	75	5	4.85	1.12
335	XZ	1	52	7	1	58	160	22.6562	96	1	0	0	0	30		clozapine	100	0		21	21	44	86
336	HA	2	33	8	2	61	164	22.68	93	0.93	0	0	0	29	6	olanzapine	600	1	2	14	23	44	81	53		5.77	1.49
337	YF	1	66	12	2	61	164	22.68	83	0.902	0	1	0	23		risperidone	240	0		14	27	37	78	79	5.6	4.35	0.74
338	XZ	1	32	11	1	76	183	22.694	83	0.892	0	0	0	26		risperidone	120	0		13	16	39	68	66	5.41	4.32	0.75
339	XZ	2	50	5	2	56	157	22.719	89	0.927	0	0	0	29				0		13	22	36	71		4.32	3.31	1.14
340	WJ	1	29	11	2	72	178	22.7244	88	0.907	0	0	0	28				0		14	18	37	69	68	5.3	3.95	1.34
341	XZ	2	35	5	2	57.5	159	22.7444	90	0.947	0	0	0	25
342	HA	1	52	8	2	65	169	22.7583	80	0.851	0	0	0	21	17	clozapine	100	0		20	30	57	107	54		4.19	1.03
343	HA	1	41	11	3	65	169	22.7583	77	0.856	0	0	0	33	28	risperidone	360	0		25	35	59	119	64
344	HA	1	63	6	1	59	161	22.7615	74	0.841	0	0	0	35	121	aripiprazole	200	0		11	26	43	80	55	4.3	6.29	1.46
345	HA	1	64	11	3	62	165	22.7732	82	0.82	0	0	0	41	237	risperidone	180	1	4	11	20	39	70	67	4.22	3.78	0.52
346	XZ	1	54	5	1	62	165	22.7732	77	0.928	0	0	0	40	19	sulpiride	37.5	0		16	13	35	64	61	8.91	2.18	0.84
347	YF	1	43	9	1	73	179	22.7833	80	0.792	0	0	0	20		quetiapine	375	0		12	19	34	65	82
348	HA	2	54	12	1	57	158	22.8329	73	0.811	0	0	0	18	243	olanzapine	600	0		21	26	51	98	74		4.26	0.86
349	HA	1	65	8	2	57	158	22.8329	92	1.045	0	0	0	25	201	olanzapine	450	1	4	16	22	41	79	51	4.59	3.82	1.03
350	XZ	2	36	5	2	57	158	22.8329	80	0.93	0	0	0	25		clozapine	100	1	2	28	14	50	92	69	3.75	3.17	0.53
351	WJ	1	57	11	1	66	170	22.8374	95	0.969	0	0	0	39		quetiapine	75	0		12	24	43	79	64	4.9	3.98	2.88
352	XZ	1	36	8	1	66	170	22.8374	93	0.903	0	0	0	27	58	risperidone	240	0		16	19	40	75	72
353	HA	1	57	9	2	70	175	22.8571	74	0.871	1	0	0	33		clozapine	50	0		19	22	43	84		6.06	3.53	1.29
354	XZ	1	35	11	1	70	175	22.8571	93	1	0	0	0	25	10	amisulpride	150	0		24	19	47	90	66
355	XZ	1	44	11	3	70	175	22.8571	102	0.944	0	0	0	23	114	clozapine	125	0		16	14	34	64	61	4.66	3.56	1.3
356	HA	1	61	9	1	60	162	22.8624	90	1	0	0	0	24	19	risperidone	120	0		11	31	36	78	52		4.29	1.57
357	YF	1	69	8	1	60	162	22.8624	88	0.946	0	0	0	31		quetiapine	75	0		16	28	42	86	58	4.8	4.8	1.93
358	XZ	2	44	11	1	60	162	22.8624	89	0.927	0	0	0	30						25	13	39	77	60	5.01	3.97	2.18
359	XZ	2	31	8	3	63	166	22.8625	83	0.965	0	0	0	19		clozapine	100			25	23	49	97	67	5.24
360	XZ	2	45	5	1	55	155	22.8928	93	1.045	0	0	0	9	400	risperidone	120	1	2	17	40	51	108	52	4.88
361	HA	1	51	8	1	75	181	22.8931	87	0.906	0	0	0	19	317	risperidone	120	1	2	13	14	31	58	62	4.74
362	HA	1	54	18	4	67	171	22.913	85	0.904	0	0	0	40	106	Perospirone		0		10	14	27	51		4.24	4.24	1.4
363	WJ	2	55	12	3	53	152	22.9398	84	0.913	1	0	0	43				0		17	31	43	91	59	6.4	4.12	2.21
364	XZ	2	26	15	2	58	159	22.9421	80	0.889	0	0	0	18	60	clozapine	50	1	2	30	18	31	79	68	6.19
365	XZ	1	29	6	1	98	182	29.5858	107	1.039	0	0	0	12	28	clozapine	200	0		14	33	53	100		5.22	2.76	0.8
366	HA	1	61	5	2	61	163	22.9591	76	0.927	0	0	0	25	22	risperidone	240	0		13	20	40	73			5.28	1.4
367	WJ	1	60	15	2	72	177	22.9819	91	0.948	1	0	0	40	6	aripiprazole	200	0		15	20	34	69	79	6	4.61	0.85
368	WJ	1	33	11	2	68	172	22.9854	89	0.947	0	0	0	17		clozapine	237.5	0		26	22	48	96		5.1	5.07	0.96
369	WJ	1	30	9	1	68	172	22.9854	87	0.888	0	0	0	25		clozapine	150	0		13	15	27	55	84
370	HA	1	56	11	2	68	172	22.9854	84	1.024	0	0	0	42	58	aripiprazole	200	1	4	16	18	35	69	54	4.77	4.14	0.68
371	HA	1	44	8	2	65	168	23.03	93	0.959	0	0	0	31	6	olanzapine	600	0		23	15	35	73	69	7.35
372	YF	1	55	15	1	65	168	23.03	85	0.895	0	0	0	18		clozapine	150	0		18	21	37	76	78
373	YF	1	61	9	1	65	168	23.03			0	0	0	34		clozapine	25	1	4	12	14	30	56	79	4.4	5.39	1.41
374	XZ	1	39	7	1	65	168	23.03	76	0.916	0	0	0	25		olanzapine	300	0		30	13	50	93		3.66	2.82	1.31
375	WJ	2	45	5	3	59	160	23.0469	88	0.957	0	0	0	36		clozapine	12.5	0		14	20	35	69	47	6.6	3.7	0.85
376	HA	1	54	15	1	59	160	23.0469	79	0.975	0	0	0	29	16	risperidone	240	1	6	19	30	51	100	46	4.58	5.13	1.42
377	XZ	2	33	8	1	59	160	23.0469	100	1.163	0	0	0	22		clozapine	50	1	2	26	32	53	111	52	4.49	3.31	1.25
378	XZ	1	34	8	1	59	160	23.0469	76	0.817	0	0	0	20	108	risperidone	240	0		15	30	52	97	50	4.59	2.77	0.44
379	WJ	2				62	164	23.0518	90	1	0	0	0					0		19	29	45	93
380	XZ	1	54	11	1	62	164	23.0518	97	1.078	0	0	0	23	96	clozapine	75	0		19	18	36	73	67	3.82	3.36	1.6
381	YF	1	45	6	1	69	173	23.0546	82	0.828	0	0		26		clozapine	175			13	18	36	67	67	4.8	4.24	1.97
382	HA	2	38	5	2	52	150	23.1111	77	0.939	1	0	0	17	6	clozapine	300	1	4	21	18	45	84	46	8.8	4.45	1.45
383	YF	2	33	12	1	52	150	23.1111	87	1.061	1	0	0	20		ziprasidone	225	0		12	20	43	75	73	4.9	5.6	0.96
384	XZ	1	43	8	3	70	174	23.1206	96	1	0	1	0	42	6	risperidone	240	0		18	31	47	96	53	4.84	4.33	0.99
385	HA	2	65	2	2	57	157	23.1247	73	0.88	0	0	0	26	258	Perphenazine	120	0		15	21	47	83			6.46	1.57
386	HA	1	46	8	1	63	165	23.1405	69	0.873	1	1	0	36	117	quetiapine	300	0		13	46	56	115		5.43	3.62	0.99
387	HA	2	60	8	1	60	161	23.1473	77	0.72	0	0	0	13	183	aripiprazole	300	1	2	19	22	45	86	55		4.74	0.96
388	YF	1	55	11	1	75	180	23.1481	93	0.939	0	0	0	17		quetiapine	150	0		18	17	41	76	77	5.1	3.28	0.93
389	HA	1	44	8	2	67	170	23.1834	90	0.947	0	1	1	24	6	olanzapine	600	0		20	32	48	100			4.75	0.85
390	HA	2	56	15	3	61	162	23.2434	90	0.9	0	0	0	23	176	risperidone	360	1	4	19	23	36	78	71	5.05	5.2	2.35
391	YF	1	49	6	1	61	162	23.2434	85	0.885	1	0	0	24		risperidone	240	0						60	5.9	3.4	1.37
392	HA	2	55	8	3	53	151	23.2446	88	0.946	1	0	0	18	12	risperidone	360	1	4	17	25	42	84		6.27	4.52	2.15
393	WJ	1	47	11	3	68	171	23.255	91	0.938	0	0	0	27		clozapine	425	1	4	12	16	37	65	56	5.1	4.7	2.11
394	HA	1	55	9	1	68	171	23.255	86	0.956	0	1	0	24	93	clozapine	75	0		14	30	42	86	53	4.81	3.25	0.59
395	YF	1	64	2	3	73	177	23.3011	92	0.939	0	0	0	26		clozapine	25	0		11	22	35	68	69	5.8	4.08	1.08
396	HA	1	48	8	2	65	167	23.3067	92	1.057	0	0	0	19	13	clozapine	250	0		18	28	52	98
397	XZ	1	47	5	3	69	172	23.3234	96	1	0	0	0	17	13	risperidone	120	0		13	40	42	95		4.71	3.18	0.97
398	YF	2	50	9	1	52.5	150	23.3333	88	0.946	0	0	0	17		clozapine	150	0		12	36	57	105	72	7.8	6.86	1.35
399	XZ	2	32	8	2	62	163	23.3355	87	0.967	0	0	0	24	6	risperidone	120			15	20	31	66	50	4.79
400	XZ	2	37	10	2	59	159	23.3377	89	1	0	0	0	35		risperidone	60	0		20	10	27	57	72	4.6	3.56	0.88
401	HA	1	61	6	1	66	168	23.3844	94	0.979	0	0	0	51	126	clozapine	400	0							4.75	4.53	1.31
402	HA	2	42	8	1	57	156	23.4221	89	0.908	0	0	0	13	54	risperidone	360	1	4	18	20	40	78	51	5.09	3.92	1.36
403	YF	2	57	12	3	63	164	23.4236	90	0.9	1	1	0	23		clozapine	75	0		15	10	31	56	68	7.9	3.35	2.09
404	XZ	1	54	8	3	63	164	23.4236	160	1.6	0	0	0	33		clozapine	200	0		10	13	26	49	86	5.79	2.83	0.89
405	HA	1	61	11	1	58.5	158	23.4337	82	0.953	0	0	0	32	340	quetiapine	300	0		16	16	35	67	54	4.35	4.11	0.74
406	WJ	2	31	14	2	60	160	23.4375	92	0.92	0	0	0	26		olanzapine	150	0		13	18	42	73	72
407	HA	1	66	5	1	60	160	23.4375	80	0.909	0	0	0	26	324	olanzapine	300	0		14	33	45	92	50	4.61
408	XZ	2	41	8	3	60	160	23.4375	86	1	0	0	0	32						13	10	37	60	80	4.14	3.17	0.67
409	XZ	2	50	5	2	60	160	23.4375	83	0.892	0	0	0	20	36	sulpiride	75			25	26	59	110		4.11
410	XZ	2	29	8	1	60	160	23.4375	76	0.854	0	1	0	16	48	aripiprazole	200	0		9	30	39	78	54	4.44
411	XZ	1	52	8	3	76	180	23.4568	97	1.021	0	0	0	30	240	clozapine	150	0		11	12	32	55	76	5.85	4.25	1.84
412	HA	1	32	8	1	67	169	23.4586	86	0.977	0	0	0	23	28	risperidone	360	1	4	18	24	49	91	49		4.68	1.42
413	XZ	1	62	8	4	64	165	23.5078	103	1.03	0	0	0	44	36	clozapine	100	0		29	19	46	94	57
414	HA	1	49	9	2	72	175	23.5102	85	0.924	0	0	0	18		clozapine	200	0		33	20	47	100	54		4.41	1.98
415	HA	1	67	15	2	68	170	23.5294	95	0.905	1	1	1	38	92	quetiapine	300	0		12	27	43	82		3.86
416	HA	1	33	8	1	68	170	23.5294	88	0.917	0	0	0	19	6	clozapine	300	0		11	20	35	66	103	5.13	4.91	1.57
417	WJ	2	47	8	3	58	157	23.5304	82	0.872	0	0	0	25		clozapine	75	1						72
418	HA	1	57	11	2	61	161	23.533	80	0.86	0	1	0	41	57	olanzapine	150	0		12	19	42	73	56
419	HA	1	69	11	1	61	161	23.533	108	1.009	0	0	0	39	232	olanzapine	300	0		17	13	34	64	80	5.34	5.6	0.86
420	HA	2	57	15	3	61	161	23.533	80	0.889	0	0	0	37	13	clozapine	350	0		28	34	60	122		4.57	3.4	0.7
421	HA	1	56	8	1	61	161	23.533	77	0.875	0	1	0	22		risperidone	180	0		15	20	41	76	66		3.72	1.2
422	YF	1	61	12	1	65	166	23.5883	85	0.85	0	0	0	23		risperidone	180			18	17	38	73	81	5.4
423	HA	1	59	11	3	69	171	23.597	105	1.061	0	0	0	37	12	clozapine	100	0		14	23	44	81	51	4.34	5.91	2.23
424	YF	1	52	10	2	69	171	23.597	80	0.879	0	0	0	26		clozapine	100	1		12	16	32	60	74	5.8	6.21	3.36
425	HA	2	47	15	1	56	154	23.6128	85	0.895	0	0	0	27	12	risperidone	240	0		10	14	30	54		5.3	4.48	1.15
426	XZ	2	28	8	1	74	177	23.6203	88	0.889	0	0	0	17	36	clozapine	200	0		9	13	24	46	75	4.62	2.86	1.26
427	XZ	1	46	7	1	74	177	23.6203	100	1.01	0	0	0	26	48	risperidone	90	0		12	20	35	67	73	4.69	4.17	1.8
428	WJ	1	31	9	2	62	162	23.6244	85	0.904	0	0	0	31		olanzapine	375	1	2	21	22	35	78	72	4.6	4.19	1.22
429	HA	1	45	8	1	62	162	23.6244	78	0.876	0	0	0	38	83	risperidone	360	1	4	15	21	33	69	71		3.51	0.76
430	XZ	2	33	11	3	62	162	23.6244	89	1	0	0	0	19		risperidone	120	0		14	17	29	60	68	4.16	4.41	1.48
431	HA	1	65	8	1	80	184	23.6295	102	0.927	0	1	1	30	90	olanzapine	600	0		7	10	25	42	66
432	WJ	1	50	13	1	64	164.5	23.6509	89	0.978	0	0	0	20		clozapine	150	1	4	15	15	32	62	60	4.9	3.4	1.73
433	HA	1	51	18	3	70	172	23.6614	87	0.906	0	0	0	30	20	clozapine	100	0		20	19	43	82			3.4	2.05
434	XZ	1	46	8	1	70	172	23.6614	100	1.042	0	0	0	18	78	clozapine	175	0		12	28	32	72	85	4.61	3.01	0.88
435	WJ	2	52	15	2	66	167	23.6652	90	0.9	1	0	0	30		olanzapine	3000	1	4	23	15	35	73	84
436	YF	2	53	12	2	66	167	23.6652	88	0.88	0	0	0	33		olanzapine	10	1	4	12	25	45	82	59	4.1	5.18	1.46
437	YF	1	55	9	3	66	167	23.6652	85	0.787	0	0	0	27		risperidone	120	0		15	11	24	50	82	3.9		3.8
438	WJ	1	61	12	1	75	178	23.6713	92	0.979	1	1	0	33		clozapine	75	0		11	20	33	64		6.2	4.32	2.7
439	HA	1	55	8	2	71	173	23.7228	101	1	1	1	0	22	180	amisulpride	150	0		11	24	37	72	51	5.1	3.84	1.47
440	YF	1	50	11	1	71	173	23.7228	93	0.93	0	0	0	26		risperidone	180	0		12	19	29	60	74	5.1	4.38	0.81
441	XZ	1	34	5	1	71	173	23.7228	92	1	0	0	0	21	96	clozapine	125	0		15	28	50	93	61	4.73	4.32	3.6
442	YF	2	56	15	2	61.5	161	23.7259	82	0.891	0	0	0	22		quetiapine	525	0		14	22	39	75	52	4.9	4.78	1.5
443	HA	2	65	0	1	60	159	23.7332	93	0.93	0	0	0	22	410	risperidone	240	1	4	18	26	45	89		6.85	5.77	0.76
444	XZ	2	57	11	4	60	159	23.7332	93	1.045	0	0	0	21	48	clozapine	50			10	41	53	104		4.37
445	WJ	2	42	8	1	67	168	23.7387	99	0.99	1	0	0	16		olanzapine	7500	1	2	11	28	43	82	62	5	4.5	1.85
446	WJ	1	52	8	2	72	174	23.7812	92	0.939	0	0	0	52		olanzapine	450	0		12	18	28	58	85	6.2	4.12	3.53
447	HA	1	61	12	1	72	174	23.7812	88	0.926	0	0	0	23	34	clozapine	125	0		16	39	53	108	55	4.8
448	HA	1	69	8	1	64	164	23.7954	100	1.064	0	1	0	27	127	olanzapine	300	0		7	11	19	37	76	5.08	4.89	1.83
449	HA	1	65	8	1	64	164	23.7954	85	0.895	0	1	0	30	158	risperidone	360	0		13	26	46	85	55	4.06	4.29	0.62
450	HA	2	61	8	1	55	152	23.8054	92	1.022	1	1	1	25	7	risperidone	60	0		15	22	38	75		5.05	1.98	0.73
451	HA	1	52	5	1	68	169	23.8087	86	0.977	1	1	0	32	12	clozapine	400	0		22	18	35	75		6.38	4.65	0.75
452	WJ	2	57	9	2	61	160	23.8281	85	0.885	0	0	0	43		risperidone	240	0		12	13	34	59	68	6.4	5.02	1.63
453	XZ	2	39	5	2	61	160	23.8281	89	0.927	0	0	0	18		clozapine	50	0		22	30	55	107	45	6	3.97	1.48
454	XZ	2	28	5	1	61	160	23.8281	86	1	0	0	0	24		clozapine	50	0		14	18	36	68	71	4.09	3.85
455	XZ	2	32	7	1	61	160	23.8281	89	0.957	0	0	0	21	72	clozapine	75	0		21	22	39	82	49	4.88	4.18	1
456	XZ	2	35	15	1	58	156	23.833	67	0.67	0	0	0	21	36	risperidone	60			19	12	34	65	77	4.66
457	WJ	2	25	15	1	73	175	23.8367	89	0.848	0	0	0	14		olanzapine	1875	0		9	13	21	43	78	4.4	3.27	0.54
458	WJ	2	32	8	1	65	165	23.8751	73	0.716	0	0	0	30		olanzapine	450	0		12	11	25	48	67
459	HA	2	48	9	1	65	165	23.8751	92	1.15	0	0	0	19	89	risperidone	420	1	4	20	24	52	96	73		4.98	0.97
460	YF	1	31	12	1	65	165	23.8751	92	0.902	0	0	0	15		risperidone	480	1	4	21	15	45	81	78		4.25	1.79
461	XZ	1	34	8	1	65	165	23.8751	94	1.022	0	0	0	20	22	clozapine	25	0		15	18	35	68	66	4.24	6.26	1.64
462	YF	1	60	8	3	69	170	23.8754	94	0.895	0	0	0	15		olanzapine	300	1	2	10	22	32	64	53
463	YF	1	55	9	1	69	170	23.8754	93	0.93	0	0	0	19		clozapine	125	0		16	17	36	69	66
464	XZ	1	33	7	1	74	176	23.8895	96	0.96	0	0	0	27	43	clozapine	150	0		29	37	63	129	54
465	YF	1	55	9	2	56	153	23.9224	81	0.844	0	0	0	19		chlorpromazine	100	0		15	22	40	77	52
466	XZ	1	39	6	1	81	184	23.9249	86	0.966	0	0	0	19		risperidone	120	0		18	18	44	80	45	5.26	4.14	0.87
467	HA	1	50	14	1	59	157	23.9361	76	0.905	0	0	0	20	43	risperidone	360	1	2	31	29	49	109	70		4.63	0.96
468	HA	1	61	8	2	70	171	23.939	95	0.913	0	1	0	41		olanzapine	600	0		14	19	36	69	69	5.02	4.65	1.28
469	XZ	1	32	5	1	70	171	23.939	92	0.979	0	0	0	29	37	clozapine	175	0		16	17	30	63	78	5.36	3.41	0.76
470	HA	2	55	6	1	66	166	23.9512	96	1	1	0	0	35	8	olanzapine	600	1	6	16	26	48	90		6.12	7.25	4.12
471	HA	1	63	8	1	66	166	23.9512	104	0.874	0	1	0	32	6	aripiprazole	400	0		11	24	33	68	65	4.46	3.97	2.38
472	WJ	2	34	9	1	71	172	23.9995	96	1.032	0	0	0	21		clozapine	25	1	2	13	23	40	76	63	5.8	5.72	1.04
473	WJ	2	37	12	2	54	150	24	79	0.908	0	0	0	18		clozapine	25	0		17	35	58	110	51	4.3	4.52	1.72
474	WJ	1	61	11	2	63	162	24.0055	87	0.967	0	0	0	28		clozapine	50	0		13	41	38	92	50	5	4.82	2.57
475	YF	2	56	15	1	63	162	24.0055	80	0.889	1	0	0	29		risperidone	240	0		22	35	50	107		4.4	5.19	2.39
476	XZ	1	30	5	1	63	162	24.0055	86	0.956	0	0	0	17	6	clozapine	75	0		20	19	40	79	88	4.65	4.6	0.67
477	WJ	2	43	12	3	61.5	160	24.0234	85	0.944	0	0	0	28		olanzapine	300	0		25	19	50	94	65	5.7	3.19	0.98
478	YF	2	39	9	1	61.5	160	24.0234	100	1	0	0	0	18	6	aripiprazole	200	1	4	12	13	27	52	62	4.2	2.3	0.98
479	WJ	2	40	8	3	60	158	24.0346	92	0.868	0	0	0	22		olanzapine	600	0		25	21	46	92		6.3	6.29	1.41
480	HA	1	48	12	1	72	173	24.0569	86	0.915	0	0	0	21	60	risperidone	360	1	2	11	28	43	82	67	4.69
481	XZ	1	51	4	1	72	173	24.0569	100	1	0	0	0	48	22	clozapine	100	0		10	22	34	66	56	5.16	4.47	3.05
482	HA	1	54	12	1	64	163	24.0882	87	1.036	1	1	0	21	301	risperidone	360	0		19	18	41	78	76	5.2	5.16	1.96
483	XZ	1	34	9	1	64	163	24.0882	76	0.95	0	0	0	25		clozapine	75	0		12	29	41	82	60	4.63	3.18	0.49
484	WJ	1	48	11	2	68	168	24.093	85	0.924	1	0	0	26		olanzapine	525	0		9	20	34	63	60	24.1	4.49	0.94
485	XZ	1	44	8	1	68	168	24.093	77	0.963	0	0	0	29		risperidone	240	0		22	13	39	74	58	4.91	3.23	0.56
486	WJ	1	31	15	1	73	174	24.1115	85	0.885	0	0	0	16		olanzapine	150	0		11	22	39	72	73	4.7	3.55	1.51
487	XZ	2	26	8	1	61	159	24.1288	90	1	0	0	0	15	6	clozapine	25			27	43	63	133	54	4.31
488	HA	2	58	11	1	58	155	24.1415	88	1	1	0	0	33	12	olanzapine	600	1		9	14	30	53	54	4.19	4.57	1.06
489	HA	1	44	8	1	69	169	24.1588	97	1	0	0	0	19	15	clozapine	350	0		10	10	28	48	76		5.4	1.2
490	HA	1	59	8	1	74	175	24.1633	100	1.01	0	0	0	19	7	clozapine	150	1	4	19	21	40	80	53	4.95	4.46	0.61
491	YF	1	50	8	1	65	164	24.1672	81	0.88	0	0	0	19		clozapine	50	1	2	11	23	36	70	70	3.9	3.98	1.49
492	YF	1	43	15	1	75	176	24.2123	90	0.882	0	1	0	17		quetiapine	450	1	4	10	16	24	50	104	5.1	6.89	1.77
493	HA	1	46	8	3	62	160	24.2188	95	1.056	0	0	0	16	69	risperidone	360	0		33	25	63	121	51		3.64	1.67
494	HA	1	64	6	3	70	170	24.2215	106	0.964	0	0	0	34	40	risperidone	120	0		13	33	54	100		7.09	3.38	3.33
495	HA	1	44	15	3	70	170	24.2215	82	0.891	0	0	0	35	6	risperidone	120	1	4	18	23	51	92	59		4.51	0.9
496	HA	1	54	11	1	70	170	24.2215	95	0.95	1	0	0	32	480	risperidone	240	1	4	10	23	39	72		5.23	3.7	1.67
497	YF	1	42	5	3	70	170	24.2215			0	0		41						14	32	45	91	50	3.7	83.9	1.6
498	HA	1	55	5	1	66	165	24.2424	92	1.045	0	0	0	25	166	risperidone	240	0		16	31	43	90	47		4.72	1.14
499	HA	1	49	15	1	66	165	24.2424	88	0.889	0	0	0	23	63	amisulpride	150	0		11	25	39	75	78	4.21	4.63	2.01
500	XZ	2	44	5	1	51	145	24.2568	86	1.075	0	0	0	38				0		32	29	58	119	50	4.32	4.61	1.61
501	XZ	1	29	6	1	76	177	24.2587	83	0.892	0	0	0	26	6	clozapine	25	0		17	11	28	56	68	5.12	3.17	1.32
502	HA	1	42	8	2	71	171	24.281	95	0.931	0	0	0	27	6	risperidone	240	0		8	17	25	50	84	4.08	5.44	1.12
503	HA	1	56	11	1	63	161	24.3046	82	0.901	0	0	0	39	92	clozapine	62.5	1	4	15	32	52	99		4.29	2.96	0.8
504	WJ	2	40	11	2	67	166	24.3141	86	0.925	0	0	0	28		olanzapine	450	1	2	16	16	44	76	89	7.6	4059	1.55
505	HA	1	56	8	1	67	166	24.3141	93	0.939	0	0	0	20	123	quetiapine	112.5	0		15	21	41	77	50	5.74	4.68	1.35
506	XZ	1	49	7	1	67	166	24.3141	80	0.964	0	0	0	40	6	clozapine	100	0		15	22	40	77	72	6.58	4.4	1.72
507	YF	1	49	16	1	72	172	24.3375	78	0.848	0	0	0	35		risperidone	240	0		9	12	26	47	94
508	YF	1	60	8	1	72	172	24.3375	89	0.957	0	0		25		clozapine	50	0		20	20	43	83	54
509	HA	1	63	9	1	60	157	24.3418	109	0.965	1	0	0	33	320	risperidone	5400	0		15	23	49	87			3.52	0.74
510	XZ	2	48	5	3	60	157	24.3418	86	0.966	0	0	0	30		risperidone	120	0		10	30	43	83	50	4.42	4.06	1.6
511	XZ	2	31	8	1	60	157	24.3418	89	1	0	0	0	25	24	chlorpromazine	50	0		19	9	40	68	68	5.14	3.32	1.13
512	XZ	2	42	5	2	60	157	24.3418	93	1.033	0	0	0	20	60	clozapine	50	1	2	20	22	49	91	50	3.62
513	XZ	1	28	11	1	68	167	24.3824	80	0.825	0	0	0	24		risperidone	240			12	13	35	60	72	5.19	3.96	4.23
514	HA	1	46	5	1	64	162	24.3865	81	0.964	1	0	0	23	150	quetiapine	300	1	6	26	33	45	104	56	4.2	4.56	0.82
515	HA	1	68	11	2	64	162	24.3865	87	0.935	0	1	0	31	39	risperidone	120	0		16	10	32	58	78
516	YF	1	56	6	1	64	162	24.3865	93	0.886	0	1	0	18		risperidone	180			15	31	47	93		5.8
517	XZ	2	43	8	1	64	162	24.3865	96	1.067	0	0	0	18		clozapine	75	0		32	30	55	117	46	5.35	4.06	1.69
518	HA	2	40	5	2	52	146	24.3948	80	0.889	0	0	0	22	6	clozapine	75	0							5.75	5.13	0.88
519	HA	1	47	8	1	76.5	177	24.4183	95	0.979	0	0	0	26	88	clozapine	300	0		21	21	36	78	56	4.77	4.05	0.73
520	HA	1	54	8	1	74	174	24.4418	99	1.042	0	0	0	26	130	risperidone	360	0		17	9	31	57	82	5.38
521	YF	1	35	9	1	74	174	24.4418	94	0.959	1	0	0	17		risperidone	300	1	4	14	19	44	77	69	7	4.34	1.98
522	XZ	2	57	11	2	55	150	24.4444	90	1.034	0	0	0	21	6			1	2						5.17
523	HA	1	56	5	1	69	168	24.4473	93	0.969	0	0	1	28	30	olanzapine	300	0		11	26	34	71	53	4.51	4.42	1.42
524	HA	1	65	8	1	69	168	24.4473	84	0.866	0	1	0	21	420	risperidone	360	1	4	14	22	43	79			3.58	0.69
525	XZ	1	34	15	1	69	168	24.4473	90	0.9	0	0	0	24	41	clozapine	150	0		16	19	36	71	90	5.36	3.41	0.76
526	HA	1	61	8	2	65	163	24.4646	96	1.021	0	1	0	26	48	clozapine	175	0		25	16	46	87	56	4.58	4.35	1.26
527	YF	1	43	6	1	65	163	24.4646	93	0.903	0	0	0	20		risperidone	240	0		20	25	50	95	54	4.5	4.78	1.27
528	XZ	1	37	8	1	65	163	24.4646	103	1.03	0	0	0	19	108	clozapine	50	0		18	25	45	88	74	6.33	3.52	1.17
529	HA	1	64	9	1	75	175	24.4898	95	0.96	0	1	0	30	82	risperidone	240	0		17	15	53	85	69
530	HA	1	55	11	3	75	175	24.4898	94	0.94	0	0	0	27	276	risperidone	240	1	4	7	15	30	52	68		3.01	0.7
531	HA	1	58	8	1	75	175	24.4898	87	0.926	0	0	0	25	209	quetiapine	75	1	4	29	21	43	93	54	4.68	4.83	0.99
532	YF	1	58	6	3	75	175	24.4898	102	0.981	0	0	0	20		olanzapine	400	0						74	3.9	4.09	2.02
533	YF	1	30	14	1	75	175	24.4898	98	0.891	0	0		15		clozapine	250							60
534	HA	1	43	11	2	70	169	24.5089	92	0.929	0	0	0	25	6	risperidone	240	0		7	20	25	52		4.49	3.49	1.85
535	HA	2	48	11	3	62	159	24.5243	80	0.851	0	0	0	28	10	clozapine	250	0		12	17	30	59	69	3.91	3.56	1.92
536	XZ	2	33	11	1	62	159	24.5243	93	0.93	0	0	0	21		olanzapine	300	0							4.19	1.42	0.68
537	WJ	1	34	13	1	76	176	24.5351	90	0.909	0	0	0	15		clozapine	75	0		24	20	47	91	64	3.9	5.22	1.49
538	XZ	1	29	8	2	76	176	24.5351	96	0.906	0	0	0	15	18	clozapine	150	0		15	18	38	71	77	4.58
539	YF	1	45		1	66	164	24.539	83	0.865	1	0	0	20		clozapine	75	0		17	21	38	76	55	4.2
540	XZ	2	39	0	2	59	155	24.5578	83	0.933	0	0	0	20		aripiprazole	100	0		24	23	59	106		4.42	3.23	0.68
541	HA	1	44	8	2	71	170	24.5675			0	0	0	36	6	risperidone	360	1	4	9	16	30	55	52	6.51	4.18	1.14
542	HA	1	46	12	1	71	170	24.5675	102	1.01	0	0	0	26		olanzapine	450	1	4	16	17	34	67	74
543	XZ	1	54	5	3	77	177	24.5779	89	0.927	0	0	0	28	37	clozapine	50	1	4	14	36	44	94		4.36	3.91	1.3
544	XZ	2	46	5	2	63	160	24.6094	97	1.155	0	0	0	40	6	risperidone	120	1	2						3.5
545	HA	1	66	6	2	67	165	24.6097	82	0.812	0	1	0	36	70	clozapine	25	0		25	19	45	89		5.45	4.17	0.58
546	WJ	1	55	11	2	78	178	24.6181	102	0.927	0	0	0	29		clozapine	225	0		9	15	30	54	57
547	HA	1	60	9	2	78	178	24.6181	86	0.86	0	0	0	34		olanzapine	450	0		11	15	34	60	80	4.4	5.04	1.88
548	WJ	1	32	15	2	72	171	24.623	86	0.887	0	0	0	21		clozapine	300	0		14	18	34	66	65	5.1	3.94	0.7
549	YF	2	53	9	2	65.5	163	24.6528	92	0.902	0	1	0	17		Perphenazine	120	1	24	17	33	63	113	47	5.1	3.96	0.95
550	HA	2	63	9	1	60	156	24.6548	97	0.942	1	0	0	20	441	aripiprazole	200	0		19	29	55	103	49	4.93	3.71	1.17
551	YF	1	50	15	1	79	179	24.6559			0	0	0	15		risperidone	300	0		12	7	27	46	80	4.5	3.38	0.67
552	HA	1	53	6	3	69	167	24.7409	105	0.955	0	0	0	24	53	olanzapine	600	1	4	21	19	44	84	50	6.07	3.72	1.43
553	HA	1	54	8	3	61	157	24.7475	80	0.909	0	0	0	27	308	olanzapine	600	0		12	19	36	67	78		4.2	0.64
554	XZ	2	45	5	4	65	162	24.7676	103	1.03	0	1	0	35	120					16	13	25	54		4.77
555	XZ	1	37	5	1	65	162	24.7676	100	1.042	0	0	0	32	23	risperidone	180	0		14	13	33	60	77	4.37	5.33	3.15
556	HA	1	69	5	1	76	175	24.8163	97	1.032	1	1	0	42	166	risperidone	120	0		9	35	51	95			5.03	1.04
557	YF	1	41	6	1	76	175	24.8163	93	0.894	0	1	0	18		clozapine	525	1	4	15	23	47	85	51	5.9	5.47	2.57
558	WJ	2	49	15	2	66	163	24.841	93	0.877	0	0	0	32		risperidone	180	0		19	19	40	78	82	5.7	3.86	2.09
559	XZ	2	22	5	1	66	163	24.841	89	0.957	0	0	0	13		clozapine	50	1	2	19	17	32	68	56	4.03	4.72	0.74
560	XZ	1	28	7	1	77	176	24.858	96	1	0	0	0	27	6	clozapine	50	1	4	30	21	49	100	52	5.08	4.87	0.89
561	XZ	1	42	11	2	78	177	24.8971	96	1.067	0	0	0	22	33	clozapine	100	0		8	16	29	53	82	4.33	2.04	0.38
562	XZ	1	53	9	1	78	177	24.8971	90	0.938	0	0	0	33	53	clozapine	150	0		10	18	28	56	71	5	4.09	1.03
563	HA	2	50	8	1	67	164	24.9108	90	0.841	1	1	0	23	200	clozapine	250	0		16	23	43	82	69	4.82	4.64	1.1
564	HA	1	56	8	1	67	164	24.9108	92	1.057	0	1	0	45	123	olanzapine	600	0		15	26	28	69		4.88	3.25	2.2
565	HA	1	53	8	2	72	170	24.9135	100	1	0	0	0	23	24	amisulpride	300	0		8	22	28	58	80	4.93	4.98	2.21
566	HA	1	67	6	1	72	170	24.9135	83	0.874	1	1	1	26	318	risperidone	300	0		17	36	51	104		4.36	4.66	0.81
567	XZ	1	43	8	2	73	171	24.9649	92	0.92	0	0	0	37	15	aripiprazole	100	0		38	15	39	92	76	4.24	3.59	1.17
568	XZ	1	31	7	1	80	179	24.968	100	1	0	0	0	19	6	clozapine	150	0		8	9	23	40	93	4.88	4.63	2.14
569	XZ	1	33	9	1	68	165	24.977	76	0.916	0	0	0	21	46	clozapine	50	0		17	16	43	76	80	5.02	5.92	1.75
570	XZ	1	33	8	1	68	165	24.977	80	0.899	0	0	0	29		risperidone	120	0		13	15	38	66	68	4.76	4.69	1.54
571	XZ	1	29	5	1	64	160	25	93	1	0	0	0	24	42	clozapine	50	0		19	22	44	85	53
572	XZ	1	46	11	2	64	160	25	83	0.83	0	0	0	36	107	clozapine	50	0		18	34	56	108		4.66	5.14	1.8
573	HA	1	65	10	1	66.5	163	25.0292	87	0.926	0	0	0	30	175	risperidone	360	0		14	23	40	77	64	4.39	3.95	1.11
574	WJ	1	59	11	2	75	173	25.0593	91	0.929	0	0	0	26		clozapine	250	0		12	13	27	52	80
575	HA	1	51	18	1	75	173	25.0593	93	0.853	0	0	0	23		olanzapine	300	0		34	21	57	112	93	5.92	3.38	0.86
576	XZ	1	38	9	3	70	167	25.0995	73	0.913	0	0	0	33	6	risperidone	120	0		29	18	45	92	69	4.65	4.69	1.06
577	XZ	1	52	7	1	70	167	25.0995	95	0.979	1	0	0	25	38	clozapine	75	1	2	15	23	37	75	71	5.69	3.64	1.64
578	WJ	1	40	11	3	76	174	25.1024	96	0.96	0	0	0	19		clozapine	50	0		22	17	46	85	62
579	YF	1	49	12	3	76	174	25.1024	98	0.99	0	0	0	20		clozapine	50	0		11	20	34	65	94	6.2	3.71	3.03
580	XZ	2	31	5	3	59	153.3	25.1054	83	0.922	0	0	0	21	120	sulpiride	75			22	27	52	101		4.97
581	XZ	2	49	11	4	55	148	25.1096	93	1.045	0	0	0	19	480			0		16	31	40	87	46	3.83
582	HA	2	54	8	1	66	162	25.1486	67	0.838	1	0	0	26	28	olanzapine	600	0		21	25	49	95	49		5	2.34
583	HA	1	67	5	1	66	162	25.1486	107	1.039	1	1	1	24	7	Perphenazine	280	0		16	10	29	55	66
584	HA	2	46	8	2	62	157	25.1532	93	0.979	0	0	0	36	16	olanzapine	450	0		13	17	31	61	55	3.93	3.66	1.7
585	XZ	2	42	8	3	62	157	25.1532	84	0.866	0	0	0	32	36	risperidone	60	1	2	13	30	41	84	64	5.05
586	HA	1	70	8	2	71	168	25.1559	86	0.977	1	1	0	45	76	olanzapine	300	0		12	31	40	83	55		2.51	1.62
587	YF	1	47	8	1	78	176	25.1808	94	0.922	0	1	0	19		clozapine	150	0		14	21	41	76	49	5.1	4.67	1.27
588	WJ	2	39	15	3	67	163	25.2174	79	0.878	0	0	0	21		risperidone	120	0		21	24	41	86	58	6	4.26	2.6
589	XZ	1	57	9	1	67	163	25.2174	83	0.933	0	0	0	37	36	clozapine	25	0		11	24	36	71	53	4.71	4.12
590	HA	1	67	6	1	80	178	25.2493	92	0.929	1	0	0	28	55	risperidone	360	0		15	29	46	90	54	6.16	3.8	0.94
591	XZ	1	45	5	1	80	178	25.2493	91	0.938	0	0	0	20	72	clozapine	250	0		18	17	46	81	71
592	YF	1	40	8	1	73	170	25.2595	97	1.021	1	0	0	20		clozapine	20	0		19	21	43	83	52		5.02	2.07
593	HA	2	35	11	1	68	164	25.2826	90	0.882	0	0	0	20	7	clozapine	300	1	6	34	24	54	112	48	5.36	3.72	0.47
594	HA	2	67	9	3	60	154	25.2994	83	0.892	0	0	0	33	231	risperidone	360	0		17	18	41	76	76	4.2	3.38	1.27
595	HA	2	66	8	2	64	159	25.3155	103	0.936	1	1	0	45	174			0		18	26	51	95	55	6.28	5.22	1.31
596	HA	1	54	11	3	64	159	25.3155	85	0.914	0	0	0	17				0		13	25	40	78			5.03	2.56
597	WJ	1	53	7	1	75	172	25.3515	92	0.958	1	0	0	27	6	aripiprazole	200	0		15	19	33	67	50	4.9	6.09	2.85
598	WJ	1	41	12	1	75	172	25.3515	98	1	0	0	0	26		clozapine	75	0		9	16	22	47	85	6.9	4.52	1.59
599	HA	1	62	5	1	75	172	25.3515	86	0.896	1	0	0	28	408	aripiprazole	400	0		13	22	42	77	63		3.8	1.55
600	HA	1	61	11	1	72.5	169	25.3843	84	0.866	1	0	0	31	168	aripiprazole	400	0		18	27	52	97		4.07	3.18	0.7
601	XZ	1	52	11	2	65	160	25.3906	89	1.035	0	0	0	38	39	clozapine	50	0		17	23	48	88	46
602	XZ	2	32	8	2	65	160	25.3906	89	0.957	0	0	0	22	120	risperidone	60			12	19	30	61	53	5.55
603	YF	1	44	9	1	76	173	25.3934	87	0.906	0	0		16		clozapine	100	0		23	24	46	93	57	3.8	3.22	0.8
604	YF	1	38	9	1	70	166	25.4028	83	0.883	0	0	0	20		ziprasidone	375	1	4	15	16	31	62	74	4.3	3.85	0.92
605	HA	1	48	8	3	77	174	25.4327	86	0.851	0	0	0	21		clozapine	200	0		12	17	35	64	79		3.37	0.81
606	HA	2	67	11	2	55	147	25.4524	89	0.937	1	0	0	29	288	risperidone	360	1	4	30	11	40	81		5.1	4.77	1.65
607	HA	1	50	11	2	71	167	25.4581	95	0.99	0	0	0	28	7	amisulpride	300	0		16	17	31	64	59	6.09	3.76	4.12
608	YF	1	37	3	1	71	167	25.4581	94	0.904	0	0	0	16		risperidone	360	0		13	20	34	67	51
609	YF	1	50	11	3	71	167	25.4581	91	0.91	0	0	0	34		quetiapine	600	0		11	9	22	42	62	5.6	5.27	4.1
610	XZ	2	29	6	2	71	167	25.4581	95	0.905	0	0	0	25		clozapine	75	0		14	26	52	92	51	4.65	8.36	3.48
611	HA	1	66	8	1	66	161	25.462	100	1	0	0	0	29	24	clozapine	2.5	0		11	38	44	93		6.12	4.21	1.24
612	HA	1	46	11	1	78	175	25.4694	89	0.957	0	0	0	16	124	olanzapine	3000	0		11	31	39	81	57	4.94	3.68	2.71
613	HA	1	48	11	1	78	175	25.4694	92	0.836	0	0	0	28	93	risperidone	240	0		13	23	39	75			4.4	0.64
614	WJ	1	28	11	1	72	168	25.5102	92	0.948	0	0	0	23		clozapine	50	0		16	23	38	77	84	4.8	4.4	1.64
615	HA	1	57	8	1	72	168	25.5102	90	0.918	0	0	0	33	20	olanzapine	600	1	2	22	22	43	87		4.4	5.04	1.15
616	HA	1	58	12	1	72	168	25.5102	97	0.97	1	0	0	18	315	clozapine	100	0		14	21	33	68	47	9.9	3.23	0.71
617	YF	1	50	11		80	177	25.5354	96	0.96	0	0	0	18		quetiapine	300	0		9	14	30	53	97		4.02	0.82
618	HA	2	56	11	1	63	157	25.5588	78	0.813	1	0	0	21	74	risperidone	1800	1	4	14	21	31	66	73	5.45	2.78	1.01
619	XZ	1	35	9	1	73	169	25.5593	100	0.98	0	0	0	28	84	clozapine	225	1		10	23	42	75	60	4.29	2.9	0.66
620	WJ	1	25	11	1	76.5	173	25.5605	93	0.939	0	0	0	15		risperidone	300	1	2	23	26	47	96	87	4.8	7.04	5.44
621	HA	1	62	12	1	81	178	25.565	90	0.9	0	0	1	23		clozapine	75	1	4	20	20	45	85			3.17	1.63
622	WJ	2	47	11	3	68	163	25.5937	99	0.99	1	0	0	47		risperidone	240	1	4	20	21	48	89		4.1	2.86	0.67
623	HA	2	60	11	2	68	163	25.5937	104	1.02	1	1	0	23	11	risperidone	240	0		11	13	29	53	62	5.12	4.33	0.88
624	WJ	1	42	8	3	74	170	25.6055	100	1.042	0	0	0	30		clozapine	225	1		24	20	45	89	90
625	WJ	1	26	12	1	74	170	25.6055	93	0.921	0	0	0	20		olanzapine	450	0		12	17	38	67	69	5	4.81	1.24
626	HA	1	55	15	1	74	170	25.6055	101	1.02	0	1	0	27	32	sulpiride	225	0		12	20	35	67			6.29	1.86
627	HA	1	61	8	2	74	170	25.6055	100	0.971	1	1	0	19	7	olanzapine	600	0		12	19	39	70		5.16	5.22	1.09
628	HA	1	55	8	1	74	170	25.6055	93	0.969	1	0	0	28	43	amisulpride	600	0		12	23	37	72		7.57	3.89	2.07
629	XZ	2	39	8	3	60	153	25.6312	90	0.938	0	0	0	26	192	quetiapine fumarate	225			36	21	47	104		4.09
630	HA	2	45	6	3	64	158	25.6369	100	0.971	0	0	0	19	20	clozapine	350	0		21	32	50	103	48		4.95	1.47
631	XZ	2	40	15	1	64	158	25.6369	93	1	0	0	0	25		risperidone	120	0		25	27	36	88	85	4.77
632	YF	1	57	9	1	75	171	25.6489	97	0.951	0	0	0	27		olanzapine	600	0		9	13	27	49	69	4.7	4.02	0.81
633	HA	1	54	8	1	69	164	25.6544	96	0.941	0	0	0	37	197	clozapine	150	0		20	38	48	106	60		3.45	1.46
634	HA	1	41	7	2	65	159	25.711	102	1.146	0	0	0	13	6	clozapine	200	1	4	10	20	45	75	67		4.35	1.31
635	YF	1	53	12	1	70	165	25.7117	95	0.896	0	0	0	21		clozapine	300	0		14	10	36	60	82	4.6	4.62	1.5
636	XZ	1	30	8	1	61	154	25.721	73	0.82	0	0	0	18		clozapine	100	0		19	31	52	102		5.28	3.86	1.86
637	HA	1	68	9	1	77	173	25.7276	101	0.953	0	0	0	24	117	olanzapine	750	0		9	14	32	55	64	4.51	4.63	0.99
638	HA	1	45	8	1	77	173	25.7276	96	0.95	0	0	0	32	50	olanzapine	300	1	2	12	18	36	66	57	4.51	5.02	1.6
639	HA	1	59	11	1	77	173	25.7276	101	1.02	0	0	0	20	322	quetiapine	225	1	6	17	27	43	87		5.16	3.89	1.41
640	YF	1	47	15	1	77	173	25.7276	84	0.875	1	0	0	30		risperidone	240			15	12	29	56	85	6.3	3.9	1.36
641	YF	1	43	6	3	71	166	25.7657	89	0.881	0	0	0	27		risperidone	360	0		13	18	36	67		3.9	4.05	1.29
642	XZ	2	41	5	2	58	150	25.7778	97	1.078	0	0	0	23	36	aripiprazole	100			26	25	55	106		4.06
643	XZ	1	48	3	1	66	160	25.7812	93	1.045	0	0	0	27	64			0		17	25	41	83	46
644	HA	1	48	12	1	77.2	173	25.7944	93	0.989	0	0	0	23		clozapine	300	0		20	24	52	96		5.39	5.24	1.75
645	HA	1	30	8	1	79	175	25.7959	96	0.897	0	0	0	18	6	clozapine	300	0		21	23	44	88	57	5.28
646	YF	1	52	8	2	72	167	25.8166	94	0.969	0	0	0	37		risperidone	180	1	4	15	24	36	75	53	4.9	5.05	2.09
647	XZ	2	31	8	3	63	156	25.8876	89	0.957	0	0	0	21	60			0		18	31	41	90		4.61
648	XZ	1	34	11	1	68	162	25.9107	96	0.932	0	0	0	26	40	clozapine	100	0		18	20	51	89	61
649	XZ	1	41	8	3	84	180	25.9259	166	1.612	0	0	0	37	13	clozapine	100	1	4	15	13	34	62	60
650	XZ	1	23	9	1	84	180	25.9259	96	1.011	0	0	0	15	9			0		17	27	37	81	68	4.3	6.18	3.3
651	WJ	1	26	8	1	75	170	25.9516	94	0.94	0	0	0	15		clozapine	225	0		12	25	38	75	50	5.1	4.84	2.04
652	XZ	1	45	11	3	75	170	25.9516	106	1.06	1	0	0	20	120	clozapine	150	0		15	16	38	69	81	6.15
653	XZ	1	39	8	1	75	170	25.9516	96	1	0	0	0	28	64	clozapine	150	0		12	26	46	84	66
654	HA	2	57	11	3	64	157	25.9645	97	0.898	0	0	0	35	184	olanzapine	450	0		10	11	31	52	79	5.27	3.12	1.67
655	XZ	2	41	8	3	64	157	25.9645	86	0.925	0	0	0	25	192	amisulpride	150	0		13	24	36	73	52	4.08
656	YF	1	55	10	1	76	171	25.9909	93	0.886	0	0	0	28		risperidone	300	1	4	9	17	28	54	71	4.7	3.23	0.66
657	YF	1	50	9	3	76	171	25.9909	87	0.916	0	0	0	33		risperidone	60	0		14	17	35	66	52
658	XZ	1	45	5	1	76	171	25.9909	100	1.316	0	0	0	35	41	clozapine	100	0		18	18	40	76	56
659	YF	1	54	3	1	70	164	26.0262			0	0	0	47		risperidone	120	0		20	12	37	69		5.3	5.91	4.27
660	YF	1	59	9	3	70	164	26.0262	82	0.854	0	0	0	32		risperidone	30	0		16	25	43	84		4.8	5.16	0.69
661	HA	2	52	8	1	65	158	26.0375	91	0.938	1	1	0	33	96	amisulpride	150	0		11	15	30	56	65		7.28	4.46
662	YF	2	65	9	1	65	158	26.0375	88	0.863	0	0	0	16		risperidone	120	0		15	25	48	88	54	4.3	4.59	1.25
663	XZ	2	31	8	2	65	158	26.0375	86	0.966	0	0	0	20	122	risperidone	120			11	17	37	65	53	4.91
664	HA	1	63	9	1	79	174	26.0933	90	0.874	1	0	0	21	860	clozapine	150	1	4	12	17	36	65	60	5.11	4.11	1
665	XZ	1	25	15	1	79	174	26.0933	100	0.971	0	0	0	15	20	clozapine	25	0		15	19	38	72	89	4.18
666	XZ	2	40	8	2	66	159	26.1066	89	1	0	0	0	28		clozapine	75	0		27	26	53	106		4.41	4	2.46
667	HA	2	61	8	2	80	175	26.1224	117	1.035	0	1	0	27	205	clozapine	200	0		17	27	48	92			4.71	1.72
668	HA	1	54	11	1	80	175	26.1224	112	1.067	0	0	0	24	269	risperidone	360	0		12	19	33	64	64		5.34	2.71
669	YF	1	51	11	3	80	175	26.1224	101	0.927	1	1	0	21		aripiprazole	300	0		9	13	28	50	102
670	HA	2	59	8	2	72	166	26.1286	90	0.874	0	0	1	25	287	risperidone	360	1	6	22	25	46	93	52		5.34	1.61
671	XZ	1	36	5	1	72	166	26.1286	89	0.89	0	0	0	30	48	clozapine	50	0		11	14	36	61	69
672	XZ	2	48	5	2	62	154	26.1427	96	1	0	0	0	24	36					18	33	45	96	54	4.65
673	HA	1	66	8	1	67	160	26.1719	87	0.916	0	0	0	26	115	risperidone	120	0		15	23	39	77	60		3.57	1.86
674	XZ	2	30	15	1	67	160	26.1719	100	1.075	0	0	0	27		risperidone	120	0		16	12	25	53	83	4.49	4.36	1.83
675	HA	1	62	11	3	82	177	26.1738	115	1.211	1	1	0	27	10	clozapine	175	0		13	34	50	97	78	5.68	4.17	2.49
676	YF	1	41	9	3	82	177	26.1738	88	0.936	0	0	0	21		risperidone	360	1	4	14	18	40	72	54
677	XZ	1	33	8	1	82	177	26.1738	93	1	0	1	0	24	24	aripiprazole	400	0		21	24	44	89	81	4.58	3.93	2.15
678	YF	1	43	3	1	70.5	164	26.2121	90	0.882	0	0	0	19		clozapine	100	0		25	14	40	79	101	4.4	6.669	1.8
679	HA	1	65	8	2	74	168	26.2188	94	0.931	0	1	0	44	246	risperidone	360	1	2	15	31	45	91	49		3.09	1.49
680	HA	1	60	8	1	74	168	26.2188	99	0.98	0	0	0	23	14	clozapine	50	0		9	19	34	62			5.69	1.58
681	HA	1	58	11	1	74	168	26.2188	101	0.99	0	0	0	28	69	sulpiride	300	0		22	21	41	84		5.19	4.56	0.72
682	HA	2	48	8	2	59	150	26.2222	95	1.022	0	0	0	32	64	clozapine	300	1	4	16	26	40	82	48		5.47	2.2
683	HA	1	51	12	2	75	169	26.2596	89	0.89	1	1	0	27	157	risperidone	360	0		10	22	34	66	52	4.63	2.22	1.4
684	XZ	1	28	10	1	75	169	26.2596	90	0.928	0	0	0	18	6	risperidone	120	0		9	23	32	64	53	4.97	3.42	1.49
685	HA	1	46	11	2	89	184	26.2878	97	0.96	0	0	0	19	138	olanzapine	12000	0		19	24	36	79		4.57	4.27	1.32
686	XZ	2	47	5	1	69	162	26.2917	83	1	0	0	0	21		quetiapine fumarate	75	0							15.62	6.91	2.18
687	XZ	2	38	2	2	69	162	26.2917	93	0.93	0	0	0	35				0		29	33	69	131		3.66
688	WJ	1	30	9	1	76	170	26.2976	93	1	1	0	0	19		olanzapine	300	0		18	27	52	97	46	5.1	6.05	1.51
689	XZ	1	33	4	1	76	170	26.2976	96	1.079	0	0	0	28	42	olanzapine	1500	0		19	27	45	91	50	4.53	3.64	1.87
690	XZ	1	54	9	1	70	163	26.3465	80	0.889	0	0	0	14		clozapine	50	0		13	17	37	67	53	4.37	2.95	2.1
691	XZ	1	35	0	1	78	172	26.3656	89	0.89	0	0	0	15	18	clozapine	50	0		18	35	51	104
692	YF	1	43	6	1	79	173	26.3958	88	0.88	0	0	0	19		aripiprazole	400	1	4	10	12	36	58	80		3.79	1.61
693	HA	2	67	9	1	61	152	26.4024	103	0.963	0	0	0	19	93	risperidone	120	0		17	34	53	104		4.18	5.91	0.96
694	WJ	1	34	11	2	80	174	26.4236	94	0.949	0	0	0	23		olanzapine	300	0		12	20	28	60	89	55	5.21	1.75
695	YF	1	22	9	1	80	174	26.4236	86	0.86	0	0	0	17		risperidone	360	0		9	26	40	75	81	4.7	4.02	0.81
696	YF	1	49	12	3	80	174	26.4236	93	0.903	0	0	0	22		clozapine	200	1	4	11	15	28	54	91		3.97	1.79
697	WJ	2	56	13	3	66	158	26.4381	79	0.814	1	1	0	33		olanzapine	300	0		12	13	30	55	84
698	HA	1	66	11	2	66	158	26.4381	100	1	0	1	0	37		sulpiride	150	0		10	35	46	91		4.61	3.99	1.79
699	XZ	1	46	5	3	72	165	26.4463	100	0.943	0	0	0	36	18	risperidone	240	0		14	22	42	78	81	4.63	4.94	2.53
700	YF	1	60	11	1	74	167	26.5338	98	0.98	0	0	0	18		risperidone	60	0		12	16	28	56	69		4.26	0.8
701	YF	2	57	12	1	65.5	157	26.5731	85	0.833	0	0	0	20		risperidone	120	1	4	10	8	19	37	84	4.6	5.59	0.94
702	WJ	2	50	11	3	75	168	26.5731	100	0.917	1	0	0	26		olanzapine	450	0		19	25	53	97		10.9	3.65	2.24
703	WJ	1	31	12	1	75	168	26.5731	94	0.959	0	0	0	26		clozapine	10	0		29	22	37	88	61	4.7	4.47	1.49
704	WJ	1	44	15	1	75	168	26.5731	93	1.011	1	0	0	22		clozapine	50	0		22	18	34	74	79
705	YF	1	54	9	2	75	168	26.5731	100	1.031	0	0	0	19		clozapine	400	0		19	24	49	92		5.8	4.69	2.24
706	YF	1	37	12	1	76	169	26.6097	98	0.99	0	0	0	26		amisulpride	600	0		13	13	32	58	86	4.6	4.52	1.25
707	WJ	2	37	16	3	69	161	26.6193	102	0.99	0	0	0	25		amisulpride	300	1	4	15	16	33	64	78
708	HA	2	58	12	2	69	161	26.6193	90	0.9	0	0	0	30	58	clozapine	0.3	1	6	19	33	58	110	49		5.98	1.15
709	XZ	1	21	11	1	77	170	26.6436	93	0.903	0	0	0	21	33	clozapine	150	0		16	21	43	80	67
710	XZ	1	34	9	1	77	170	26.6436	100	0.926	0	0	0	19	62	clozapine	200	0		12	16	38	66	53	4.81	4.89	2.95
711	XZ	2	25	8	1	60	150	26.6667	86	1.036	0	0	0	16		risperidone	120	0		14	31	48	93	49	4.42	3.15	1.1
712	HA	2	54	16	3	70	162	26.6728	100	0.935	0	1	0	31	6	clozapine	150	1	2	18	22	44	84		5.03	5.81	1.42
713	HA	1	65	8	1	78	171	26.6749	93	0.959	1	1	0	32	384	risperidone	720	0		21	20	40	81		6.39	3.62	0.41
714	HA	1	40	12	1	65	156	26.7094	83	0.865	0	0	0	17	10	clozapine	225	0		16	25	41	82			4.74	1.38
715	HA	2	47	15	1	65	156	26.7094	77	0.748	0	0	0	27	108	clozapine	25	1	2	16	22	43	81	65		5.86	0.92
716	XZ	1	42	9	1	71	163	26.7229	80	0.889	0	0	0	20		clozapine	75	0		17	22	41	80	75	4.74	5.48	2.51
717	HA	1	45	7	1	80	173	26.7299	100	0.909	0	0	0	15	7	quetiapine	375	1	4	18	29	39	86	50	5.04	3.59	0.86
718	WJ	2	38	18	2	61	151	26.7532	91	0.989	1	0	0	20		clozapine	425	1	4	14	17	32	63	77
719	YF	1	50	12	1	72	164	26.7698	93	0.921	0	1	1	19		risperidone	240	0		16	21	29	66	83	4.9	4.76	1.44
720	YF	1	63	14	2	82	175	26.7755	103	0.99	0	0	0	27		chlorpromazine	350	1	4	18	15	38	71	89	5.9	4.83	1.34
721	XZ	2	46	5	2	66	157	26.7759	90	1	0	1	0	31	6	sulpiride	75			28	43	67	138
722	HA	1	50	11	1	73	165	26.8136	101	1.052	1	0	0	36	161	clozapine	125	0		16	18	35	69	50		4.8	1.33
723	YF	1	59		2	67	158	26.8386	92	0.902	0	1	0	29		risperidone	120	0		18	14	41	73			4.56	2.54
724	XZ	2	36	3	2	58	147	26.8407	83	0.922	0	0	0	20	6	clozapine	50			14	34	44	92		5.19
725	XZ	1	55	4	3	74	166	26.8544	93	1	0	0	0	51		quetiapine fumarate	37.5	0		14	23	33	70		5.75	7.01	2.05
726	WJ	1	34	11	1	75	167	26.8923	93	0.969	0	0	0	20		chlorpromazine	400	1	4	22	36	44	102		4.7	2.65	1.32
727	HA	1	38	11	3	75	167	26.8923	98	0.951	0	0	0	32	6	amisulpride	600	1	6	10	15	26	51	68	4.37	3.8	1.63
728	YF	1	58		3	75	167	26.8923	94	0.904	0	1	0	28		aripiprazole	200	0		12	22	35	69	56		3.31	1.27
729	HA	1	45	6	1	76	168	26.9274	97	0.98	1	0	0	14	20	quetiapine	525	0		19	20	43	82	66	5.78	5.65	1.54
730	YF	2	55	12	2	64	154	26.986	92	0.868	0	0	0	24		clozapine	150	0		10	19	33	62	66	7.7	4.78	2.34
731	HA	1	54	9	2	78	170	26.9896	101	1.031	0	0	0	25	6	olanzapine	600	1	2	38	18	58	114	54	4.84	3.52	1.26
732	XZ	1	38	11	1	78	170	26.9896	100	1	0	0	0	19	78	clozapine	125	0		14	17	36	67	59	4.26	4.5	2.86
733	XZ	1	36	11	1	78	170	26.9896	90	0.938	0	0	0	21	41	clozapine	100	0		11	11	27	49	97	4.26	2.55	0.49
734	YF	1	58	11	1	70	161	27.0051	95	0.96	1	1	0	22		quetiapine	75	0		13	24	35	72	88	9	5.1	1.31
735	XZ	1	52	5	1	70	161	27.0051	83	0.933	0	0	0	49	24	clozapine	50	0		17	21	47	85
736	YF	1	59	8	3	80	172	27.0416	101	0.981	0	0	0	27	6	clozapine	300	0		13	25	33	71		5.2	3.77	1.93
737	XZ	1	34	16	1	80	172	27.0416	102	0.981	0	0	0	22	48	sulpiride	150	0		20	20	49	89	90	5.1	4.35	1.99
738	HA	1	69	11	2	71	162	27.0538	97	0.98	0	1	0	29	150	risperidone	3600	0		14	24	35	73	53	4.42
739	YF	1	44		1	71	162	27.0538	93	0.894	0	0	0	22		risperidone	480	1	2	26	25	58	109	47
740	XZ	2	30	8	2	71	162	27.0538	83	0.83	0	0	0	23	12	risperidone	120			8	21	30	59	80	4.5
741	HA	1	41	8	1	81	173	27.0641	96	1	0	0	0	22	16	risperidone	360	0		11	18	34	63	59	4.81	4.37	1.09
742	HA	1	63	11	1	81	173	27.0641	100	1	1	1	0	26	10	clozapine	100	0		10	19	29	58	68		3.2	1.41
743	HA	1	62	11	2	72	163	27.0993	104	1.03	1	1	1	26	69	risperidone	240	1	4	9	15	25	49	64	9.73	3.01	1.22
744	YF	1	64	6	1	83	175	27.102	110	0.917	0	1	0	63		Perphenazine	160	0		21	25	47	93		5.1	6.12	2.07
745	XZ	1	28	8	1	83	175	27.102	100	0.935	0	0	0	16	38	clozapine	200	0		20	27	45	92	62	5.93	3.99	0.5
746	HA	2	64	5	1	61	150	27.1111	87	0.87	0	1	0	22	357	aripiprazole	300	0		22	28	57	107		4.72	3.61	0.71
747	HA	1	61	8	2	84	176	27.1178	102	0.953	1	1	1	22		quetiapine	150	0		12	17	37	66			4.24	88
748	XZ	1	31	8	2	84	176	27.1178	106	1.029	0	0	0	27	11	risperidone	240	0		13	19	35	67	61	5.25	3.54	2.01
749	HA	1	50	8	4	86	178	27.143	99	1.01	0	0	0	18	6	aripiprazole	600	0		16	20	39	75	58	5.13	4.84	1.3
750	HA	2	55	5	2	74	165	27.1809	97	0.907	0	0	0	25	204	olanzapine	450	0		20	29	52	101		5.27	4.94	1.02
751	XZ	2	47	8	3	67	157	27.1816	89	0.927	0	0	0	32	6	clozapine	25			18	22	35	75	56	4.54
752	HA	2	65	8	1	68	158	27.2392	103	0.963	0	1	0	23	273	clozapine	25	0		14	29	43	86	46	5.68	3.42	1.09
753	HA	2	60	12	2	68	158	27.2392	97	0.882	0	0	0	51	92	risperidone	240	1	4	20	21	47	88		9.51	5.02	2.61
754	XZ	1	44	8	1	76	167	27.2509	92	0.92	0	0	0	24	120	clozapine	125	0		11	40	42	93		4.36	4.88	2.3
755	HA	2	52	8	1	59	147	27.3034	77	0.77	0	0	0	16	134	clozapine	200	0		19	24	54	97	63		5.85	1.02
756	WJ	1	27	8	1	78	169	27.31	97	1.032	0	0	0	23		olanzapine	450	0		17	18	41	76	53	4.6	5.89	3.64
757	HA	1	49	8	1	80	171	27.3588	104	1.03	1	0	0	22	77	clozapine	50	0		12	17	33	62	84		5.17	0.8
758	WJ	1	37	11	1	81	172	27.3797	105	1	0	1	0	20		risperidone	60	0		16	20	39	75	55	7.7	5.24	2.95
759	HA	1	54	11	3	81	172	27.3797	100	1	1	0	0	34	36	aripiprazole	100	1	4	11	24	37	72	55	5.01	3.7	1.67
760	HA	2	51	11	1	60	148	27.3923	84	0.848	0	0	0	31	8	olanzapine	450	1	4	20	24	43	87	53	4.34	3.81	2.09
761	WJ	1	48	15	3	72	162.1	27.401	104	1.02	1	0	0	37		risperidone	180	0		8	13	30	51	100	7.4	6	3.23
762	HA	2	60	5	1	65	154	27.4077	97	0.907	1	1	0	17	6			0		28	20	49	97			4.08	1.71
763	HA	1	42	11	2	72	162	27.4348	90	0.918	0	0	0	26	6	clozapine	325	0		7	7	24	38			5.27	2.15
764	XZ	2	29	15	1	72	162	27.4348	96	0.96	0	1	0	22	6	risperidone	120	1	2	17	15	28	60	74	4.49
765	YF	1	37	12	2	85	176	27.4406	102	0.99	0	0	0	22		risperidone	300			17	16	30	63	78	4.9
766	HA	1	64	8	2	73	163	27.4756	93	0.912	0	0	0	30	276	quetiapine	75	0		15	17	41	73	63	5.68	4.78	2.01
767	XZ	1	34	3	1	74	164	27.5134	93	0.959	0	0	0	24	120	risperidone	60	1	4	30	25	44	99		4.03	3.25	0.95
768	XZ	1	43	6	2	74	164	27.5134	93	0.959	0	0	0	41	36	risperidone	240	0		12	16	38	66	85	4.59	5.18	2.67
769	WJ	1	59	11	1	75	165	27.5482	103	1.051	0	0	0	36		clozapine	175	0		17	23	45	85
770	XZ	2	31	8	3	75	165	27.5482	110	1.019	0	0	0	21						11	22	40	73	77
771	YF	1	47	11	1	78	168	27.6361	102	1	0	0	0	20		risperidone	300	0		14	17	31	62	81		6.08	3.45
772	XZ	1	34	7	1	78	168	27.6361	98	1.021	0	0	0	24	40	clozapine	100	0		12	12	36	60	62	3.76	3.15	0.35
773	XZ	1	52	5	2	79	169	27.6601	103	1.03	0	0	0	38	20	clozapine	100	0
774	XZ	1	43	8	1	80	170	27.6817	92	0.948	0	0	0	21	58	clozapine	100	1	4						5.64	3.52	0.53
775	XZ	2	48	6	1	70	159	27.6888	103	1.073	0	0	0	32		risperidone	120	0		21	31	44	96	52	4.14	3.66	2.49
776	HA	2	70	16	1	64	152	27.7008	100	0.971	1	0	0	27	338	Clozapine	150	0		23	20	55	98	66	4.91	4.89	1.43
777	WJ	1	41	16	2	83	173	27.7323	98	0.97	0	0	0	21	6	aripiprazole	200	0		15	17	31	63	70		3.07	3.14
778	WJ	2	45	2	1	71	160	27.7344	102	0.99	0	0	0	31				1	4	14	17	35	66	67
779	YF	2	50	12	1	71	160	27.7344	90	0.841	0	0	0	24		risperidone	240	1	2	14	20	35	69	68	5.3	5.54	0.92
780	XZ	2	36	8	3	71	160	27.7344	100	1.042	0	0	0	25	30	clozapine	75			10	17	38	65	54	4.51
781	XZ	2	28	8	2	71	160	27.7344	83	0.83	0	0	0	18	6	risperidone	120			13	10	36	59	71	4.28
782	HA	2	47	13	1	85	175	27.7551	107	0.947	1	0	0	25		clozapine	100	0		18	25	49	92	51		5.7	1.71
783	HA	2	51	8	2	65	153	27.7671	93	0.959	0	0	0	31	123	risperidone	360	0		17	16	37	70	60	4.87	4.77	2.05
784	XZ	2	26	8	1	65	153	27.7671	80	0.899	0	0	0	21				0		20	8	26	54	46	3.59	4.84	0.96
785	XZ	1	43	9	1	72	161	27.7767	100	0.98	0	0	0	27	93	clozapine	200	1	4	19	26	42	87	89	4.65	4.6	0.67
786	HA	1	68	5	1	73	162	27.8159	84	0.866	1	0	0	25	444	aripiprazole	300	0		13	24	39	76	58		3.17	0.73
787	HA	1	61	8	3	74	163	27.852	99	1.031	0	0	0	29	120	aripiprazole	300	1	2	14	20	42	76	75		3.82	1.12
788	WJ	2	51	12	3	75	164	27.8852	96	0.897	0	0	0	24		risperidone	240	0		12	15	22	49	85
789	HA	2	37	11	2	75	164	27.8852	88	0.863	0	0	0	30	6	risperidone	240	0		18	20	44	82	58	5.26	3.75	0.99
790	YF	1	54	6	1	75	164	27.8852	102	1	0	1	0	23		quetiapine	600	1		18	13	34	65	71	4.3	3.85	0.92
791	WJ	2	62	8	2	67	155	27.8876	93	0.912	0	1	0	32	6	aripiprazole	200	1	4	15	24	38	77
792	HA	1	60	9	2	76	165	27.9155	106	1.019	0	1	0	28	312			0		11	30	43	84		4.19	4.1	0.83
793	XZ	2	32	4	2	54	139	27.9489	90	1	0	0	0	22	480	clozapine	25			23	36	49	108		4.65
794	XZ	1	47	9	3	79	168	27.9904	83	0.933	0	0	0	31		risperidone	240	0		34	14	40	88	92	5.36	5.74	3.35
795	XZ	2	36	5	1	69	157	27.993	103	1	0	0	0	28				0							4.82	4.97	1.5
796	XZ	2	31	11	2	69	157	27.993	89	0.89	0	0	0	17		clozapine	100	0		13	34	43	90		4.51	4.12	2.05
797	YF	1	41	6	3	80	169	28.0102	97	0.882	0	0	0	20		risperidone	360	1	2	17	13	31	61	88	4.5	6.8	1.93
798	HA	2	55	11	2	70	158	28.0404	93	0.894	0	0	0	18	24	sulpiride	337.5	1	4	31	21	52	104		5.63	5.07	1.6
799	YF	1	33	8	1	86	175	28.0816	98	1.032	0	0		22		risperidone	300	1	4	11	14	26	51	79	4.7	4.64	7.3
800	XZ	2	28	8	1	72	160	28.125	96	1	0	0	0	19	12	risperidone	120			16	28	46	90	48	4.75
801	YF	2	42	14	3	78.5	167	28.1473	95	0.888	0	0	0	21		risperidone	180	0		27	13	38	78	100	4.8	5.5	1.77
802	XZ	2	47	5	2	60	146	28.1479	89	1	0	0	0	25		olanzapine	225	0							5.13	3.41	0.54
803	HA	2	58	0	1	73	161	28.1625	97	0.907	1	0	0	29	152	clozapine	200	0		16	25	41	82	53	5.54	4.19	1.73
804	YF	2	41	13	1	74	162	28.1969	95	0.905	0	0	0	17		clozapine	50	0		10	9	31	50	101	4.3
805	HA	1	64	15	2	81.5	170	28.2007	101	0.981	0	1	0	44		risperidone	360	0		20	21	43	84		4.98	3.91	1.09
806	HA	1	62	8	2	81.5	170	28.2007	102	0.962	0	0	1	57	22	olanzapine	300	0		15	22	37	74		6.92
807	WJ	2	60	11	2	71.5	159	28.2821	95	0.905	0	1	0	39		risperidone	120	0		21	24	44	89
808	XZ	1	35	6	2	68	155	28.3039	100	1.02	0	0	0	25	25	risperidone	120	0		20	31	52	103	59	4.73	5.17	1.71
809	XZ	2	41	5	2	79	167	28.3266	100	0.971	0	0	0	18	13	sulpiride	75								5.03
810	XZ	1	41	3	3	81	169	28.3604	100	1.02	0	1	0	38	42	risperidone	180	0		25	43	73	141	50	4.73	4.32	3.6
811	HA	1	64	11	2	82	170	28.3737	103	1.01	1	0	0	21	48	clozapine	50			15	21	45	81	50	5.34	5.03	1.34
812	YF	1	41	9	1	82	170	28.3737	99	0.961	0	0	0	17		alprazolam		0		16	18	32	66	68	4.9	4.88	1.57
813	XZ	2	28	8	1	82	170	28.3737	93	1.033	0	0	0	17	131	risperidone	120			21	14	45	80	77	4.18
814	YF	1	46	8	1	84	172	28.3937	98	0.961	0	0	0	28	6	olanzapine	300	0		12	18	27	57	78	5.2	5.23	2.29
815	YF	1	54	6	2	70	157	28.3987	95	0.905	0	0	0	26		clozapine	250	1	4	14	17	29	60	55	5	5.89	5.79
816	XZ	2	47	5	2	70	157	28.3987	100	1	0	0	0	34	168	sulpiride	75			21	17	43	81	61	4.11
817	XZ	2	52	5	4	70	157	28.3987	89	0.864	0	0	0	22	40	clozapine	50	1	2	17	28	42	87	48	5.91
818	YF	1	53	6	2	85	173	28.4005	95	0.941	0	0	0	21		clozapine	50	0		13	9	30	52	72		5.94	4.23
819	YF	1	33	12	1	86	174	28.4053	96	0.897	0	0	0	19		aripiprazole	300	0		15	9	27	51	94	5.6	5.4	3.34
820	XZ	1	33	8	1	90	178	28.4055	106	0.938	0	0	0	19	120	risperidone	120	0
821	HA	1	66	7	1	71	158	28.441	73	0.811	0	0	0	30	57	aripiprazole	300	0		18	31	47	96		7.98
822	HA	2	52	11	1	73	160	28.5156	104	0.954	0	1	0	40	33	olanzapine	300	1	4	22	17	34	73	78	7.46	5.74	1.8
823	WJ	2	37	16	1	70.5	157	28.6016	84	0.84	0	1	0	23		olanzapine	150	0		15	30	48	93	74	5	5.39	2.3
824	YF	1	55	3	1	77	164	28.6288	93	0.921	0	0	0	20		risperidone	360	0		13	15	29	57	55		3.97	1.96
825	HA	1	57	11	1	79	166	28.6689	95	1	0	0	0	20	99	aripiprazole	300	0		14	19	36	69	55	2.33
826	YF	1	37	9	1	80	167	28.6851	102	0.981	0	0	0	15		clozapine	125	1	4	24	23	54	101		4.4	3.66	4.3
827	XZ	1	34	8	1	81	168	28.699	90	0.928	0	0	0	24	12	amisulpride	225	0		11	23	32	66	70	4.37	4.45	1.93
828	WJ	1	32	13	1	82	169	28.7105	99	0.961	0	0	0	25		olanzapine	450	0		14	19	35	68	67	6.8	6.17	2.13
829	XZ	1	29	8	1	82	169	28.7105	80	0.86	0	0	0	14	22	clozapine	200	0		21	16	39	76	42	4.53	5.26	2.44
830	YF	1	49	3	3	90	177	28.7274	107	1.009	0	0	0	18		risperidone	120	0		19	15	42	76	60	7.6	4.35	1.74
831	HA	1	56	8	3	85	172	28.7317	93	0.949	0	1	0	15	110	risperidone	300	0		22	25	42	89	47	5.47	3.72	1.73
832	XZ	1	37	9	1	72	158	28.8415	93	0.903	0	0	0	21	50	clozapine	5	0		12	25	42	79	47	5.18	3.98	1.82
833	HA	1	68	8	1	65	150	28.8889	98	0.961	1	0	0	45	270	risperidone	360	0		29	26	44	99	46	9.48	4.18	1.37
834	XZ	2	37	8	2	65	150	28.8889	93	1.033	0	0	0	27	7	sulpiride	75			18	15	45	78	61	4.88
835	WJ	2	44	9	2	74	160	28.9062	101	0.971	0	0	0	15	6	aripiprazole	400	0		20	29	41	90	66	10	4.59	1.15
836	HA	1	22	8	1	75	161	28.9341	97	0.97	0	0	0	19	8			1	6	13	30	39	82	63	3.72	4.37	1.42
837	HA	2	60	8	2	66	151	28.9461	81	0.92	0	0	0	28	31	risperidone	240	1	4	15	25	35	75		6.1	4.9	2.07
838	HA	1	55	8	1	78	164	29.0006	103	0.936	0	0	0	34	12	risperidone	240	0		14	27	51	92	53	5.15	3.04	1.33
839	HA	1	61	8	2	79	165	29.0174	108	0.982	0	0	0	18	24	olanzapine	150	0		11	30	41	82		4.57	4.15	2.18
840	HA	2	45	11	2	68	153	29.0487	99	0.99	0	0	0	32	26	risperidone	360	0							5.34	5.78	1.91
841	YF	1	32	9	1	90	176	29.0548	106	1	0	0	0	29		risperidone	300	1	4	18	15	33	66	65	4.1	4.97	2.95
842	XZ	1	33	15	1	84	170	29.0657	93	0.969	0	0	0	24		olanzapine	300	0		13	23	40	76	78	5.57	5.46	1.77
843	YF	1	31	9	1	85	171	29.0688	100	0.971	0	0	0	21		clozapine	100	0		16	18	40	74	68	5.1	4.45	1.26
844	WJ	1	35	5	3	87	173	29.0688	99	0.99	0	1	0	32		risperidone	240	0		13	12	32	57	100	5.3	6.1	6.06
845	HA	1	60	8	1	86	172	29.0698	112	1.018	0	0	0	28	111	amisulpride	600	1	4	9	34	36	79		6.04	3.79	1.97
846	XZ	2	46	8	2	72	157	29.2101	103	1	0	0	0	30	192	sulpiride	75	0		9	14	25	48	68	4.88
847	HA	2	65	12	2	73	158	29.2421	93	0.845	0	1	0	44	224	Perphenazine	120	0		25	18	45	88	70	4.38	5.87	2.05
848	HA	2	56	11	1	74	159	29.271	96	0.923	0	0	0	44	20	olanzapine	900	0		11	8	27	46	95	4.35	5.6	2.6
849	XZ	2	53	11	2	74	159	29.271	110	1.1	0	1	0	37		sulpiride	75	0		14	23	39	76	50	5.01
850	HA	1	29	11	1	95	180	29.321	100	0.952	0	0	0	16	48	clozapine	150	1	2	26	20	51	97	66	7.07	3.14	2.15
851	HA	1	55	9	1	78	163	29.3575	100	0.943	0	0	0	30	78	aripiprazole	200	0		13	26	34	73	56		4.03	1.04
852	HA	1	45	8	1	80	165	29.3848	92	0.958	0	0	0	27	115	risperidone	3600	0		23	38	59	120		4.76	4.54	1.65
853	HA	1	54	12	1	90	175	29.3878	105	1.05	1	0	0	30	192	risperidone	240	0		14	29	47	90			4.07	3.91
854	XZ	1	21	8	1	90	175	29.3878	110	1.068	0	0	0	25	24	risperidone	120	0		21	20	41	82	55
855	YF	1	42	9	1	87	172	29.4078	102	1.01	0	0	0	35	6	clozapine	50	1	4	14	24	37	75	55
856	XZ	1	26	7	1	86	171	29.4108	100	0.98	0	0	0	22	6	clozapine	100	0		22	25	51	98	50	4.43	3.02	1.82
857	HA	2	66	7	1	68	152	29.4321	97	0.942	0	0	0	21	467	risperidone	360	0		19	26	53	98	51	4.49	4.74	0.73
858	YF	2	57	12	3	71	155	29.5525	74	0.871	0	0	0	17		quetiapine	300	0		12	16	36	64	67	4.9	5.93	3.48
859	HA	2	67	7	1	72	156	29.5858	96	0.897	1	0	0	20	56	risperidone	180	0		26	28	53	107	75	10.07	5.42	3.32
860	WJ	1	29	8	3	73	157	29.6158	94	0.887	0	0	0	16		clozapine	75	0		14	12	36	62	74	5.2	3.44	0.99
861	HA	2	65	8	3	74	158	29.6427	81	0.794	0	1	0	20	358	risperidone	1800	1	4	17	22	45	84			5.27	8.24
862	HA	2	59	10	2	75	159	29.6665	103	0.912	1	1	0	18	9	clozapine	250	0		25	26	53	104			3.9	1.58
863	XZ	1	37	11	1	78	162	29.7211	93	1.045	0	0	0	17		clozapine	50	0		10	21	34	65		4.75	3.77	2.22
864	XZ	1	32	11	1	90	174	29.7265	100	0.909	0	1	0	21	10	clozapine	250	0		20	21	46	87	67	5.51	3.7	1.97
865	WJ	2	43	11	3	80	164	29.7442	110	1.048	0	0	0	21		risperidone	120	0		13	13	34	60	86	8.2	3.88	2.02
866	YF	1	49	11	3	80	164	29.7442	95	0.896	0	0	0	30		risperidone	240	0		10	13	25	48	84
867	HA	1	70	5	1	87	171	29.7527	108	0.915	1	1	0	30	348	aripiprazole	200	0		17	27	41	85	76	6.82	3.84	1.25
868	HA	2	50	11	1	68	151	29.8233	100	0.98	0	0	0	30	22	clozapine	50	1	6	17	16	39	72		5.07	4.92	1.8
869	WJ	2	56	11	1	70	153	29.903	100	0.962	1	0	0	21		clozapine	100	0		9	15	30	54	72
870	WJ	2	50	8	3	70	153	29.903	90	0.865	0	0	0	30		quetiapine	75	0		11	18	31	60		5	5.5	2.71
871	HA	2	69	3	2	70	153	29.903	100	0.935	0	0	0	22	384	clozapine	25	0		21	27	55	103			5.51	1.88
872	WJ	1	21	11	1	72	155	29.9688	100	1	0	0	0	18	6	aripiprazole	200	0		25	13	37	75
873	XZ	2	33	8	1	72	155	29.9688	93	1	0	0	0	19		clozapine	50	0		25	11	43	79	67	5.04	3.72	1.21
874	XZ	2	44	11	3	75	158	30.0433	96	0.96	0	0	0	17		risperidone	120	0		31	12	45	88	66	9.83	5.11	2.3
875	HA	1	47	8	1	90	173	30.0712	107	1	0	0	0	16	110	aripiprazole	400	0		20	10	30	60	82	3.84	5.04	1.33
876	WJ	2	42	11	1	77	160	30.0781	93	0.861	0	0	0	23		risperidone	180	0		21	16	41	78	78
877	HA	2	53	8	1	77	160	30.0781	93	0.869	1	1	0	30	12	risperidone	360	0		20	27	51	98	49		3.82	0.9
878	HA	1	59	8	1	87	170	30.1038	105	0.875	1	0	1	27	192	amisulpride	150	0		14	24	33	71
879	XZ	1	39	8	1	87	170	30.1038	103	1	0	0	0	20	56	clozapine	100	0		17	21	44	82	49
880	HA	1	56	15	2	85	168	30.1162	110	1.019	0	0	0	22	281	risperidone	240	0		21	15	39	75	74		4.55	1.14
881	HA	2	64	8	2	68	150	30.2222	93	0.93	0	1	0	30	60	aripiprazole	600	0		18	29	50	97			3.9	0.82
882	HA	1	64	8	3	98	180	30.2469	116	0.983	0	0	0	33	192	clozapine	25	0		7	12	24	43	83	4.59
883	XZ	2	33	3	2	70	152	30.2978	96	1	0	0	0	21		clozapine	12.5	0		22	27	53	102	51	4.87	4.69	2.4
884	XZ	2	49	5	2	74	156	30.4076	100	0.971	0	0	0	34		clozapine	75	0		18	11	37	66	66	5.14	3.91	1.91
885	XZ	2	51	5	2	75	157	30.4272	100	1	0	0	0	26	74	sulpiride	75	0		19	33	42	94	52	3.95
886	HA	2	50	2	2	76	158	30.4438	97	0.882	1	0	0	33	10	risperidone	240	0		17	26	44	87	47	4.75	7.06	1.45
887	XZ	2	45	8	2	78	160	30.4688	96	0.906	0	0	0	33	164	sulpiride	75	0		17	20	49	86	61	4.39
888	XZ	2	45	8	2	78	160	30.4688	96	0.906	0	0	0	33	164	sulpiride	75			17	20	49	86	61	4.39
889	HA	1	67	9	1	86	168	30.4705	105	1.05	0	0	0	20	30					9	11	29	49	80	5	4.06	1.04
890	XZ	1	33	8	1	86	168	30.4705	103	1.03	1	0	0	23	17	clozapine	200	1	4	15	21	34	70	53
891	WJ	2	30	8	2	80	162	30.4832	92	0.902	0	0	0	14		risperidone	360	1	4	15	27	43	85		5.2
892	WJ	1	55	12	1	84	166	30.4834	114	1.086	0	0	0	19		clozapine	50	1	4	21	19	40	80	48	6.6	4.14	1.95
893	XZ	1	27	8	1	98	179	30.5858	100	0.971	0	0	0	16		clozapine	50	0		18	16	44	78	54	5.64	2.36	1.33
894	HA	1	46	8	1	95	176	30.6689	110	1	0	0	0	24		risperidone	240	1	4	24	19	47	90	97	5.4	4.05	2.56
895	HA	2	62	8	2	70	151	30.7004	113	0.966	1	0	0	16	8	risperidone	420	1	4	22	23	45	90		7.29	5.4	0.92
896	HA	2	55	11	2	72	153	30.7574	97	0.907	1	0	0	33	82	Perphenazine	80			15	18	52	85	52		2.95	2.16
897	HA	2	51	15	1	73	154	30.7809	105	0.972	0	0	0	39	34	clozapine	175	0		14	10	32	56	87	4.9	8.61	3.35
898	HA	1	47	5	1	89	170	30.7958	112	1.12	1	1	0	17	24	aripiprazole	400	1	4	29	25	51	105			3.48	0.83
899	HA	1	57	11	1	87	168	30.8248	102	0.971	0	0	0	30	25	clozapine	175	0		25	17	38	80	84		4.7	2.21
900	HA	2	63	11	2	76	157	30.8329	107	0.947	1	0	0	33	94	risperidone	180	0		21	23	50	94	66	4.59	4.01	1.07
901	XZ	2	51	5	2	77	158	30.8444	103	0.972	0	0	0	21	13	risperidone	60			22	27	46	95		4.47
902	HA	2	41	12	2	78	159	30.8532	83	0.806	0	1	1	21	6	risperidone	120	0		22	18	47	87	55	4.09	4.59	0.87
903	XZ	2	47	8	3	78	159	30.8532	106	1.029	0	1	0	28		clozapine	100	0		22	29	49	100		4.76
904	YF	1	50	9	1	84	165	30.854	100	0.909	0	1	0	21		aripiprazole	300	0		17	13	28	58	69	5.1	3.92	4.42
905	XZ	1	42	8	1	84	165	30.854	93	0.903	0	0	0	25	86	clozapine	150	1	4	19	17	45	81	55
906	XZ	2	40	8	2	81	162	30.8642	100	1	0	0	0	30		risperidone	60	0		12	38	45	95	49	4.91	5.54	2.54
907	WJ	1	55	15	2	94	174	31.0477	98	0.942	0	1	0	40		risperidone	45	0		20	26	40	86		5.7	4.3	2.73
908	XZ	2	31	15	1	72	152	31.1634	83	0.965	0	0	0	19		risperidone	120	0		26	11	44	81	70		4.14	1
909	WJ	2	54	13	2	88	168	31.1791	113	1.027	0	0	0	18		olanzapine	600	0		17	21	36	74	69	6.4	4.35	2.28
910	WJ	1	41	8	3	88	168	31.1791	100	0.98	0	0	0	15		clozapine	175	0		14	13	30	57	76
911	HA	1	43	18	1	88	168	31.1791	100	0.952	0	0	0	29				1	4	13	21	41	75		4.43	4.13	0.98
912	YF	1	48	11	1	85	165	31.2213	107	0.973	0	1	0	20		clozapine	50	0		15	25	53	93		4.3
913	XZ	2	51	8	3	76	156	31.2295	89	0.89	0	1	0	49	24	quetiapine fumarate	150	0		28	10	41	79	66	4.99
914	HA	1	62	10	1	84	164	31.2314	108	1.069	1	0	0	23	356	aripiprazole	600	0		14	18	39	71	77	5.93	4.25	1.54
915	XZ	1	40	8	1	84	164	31.2314	96	0.932	0	0	0	35	78	clozapine	100	0		13	12	37	62	74
916	XZ	2	28	11	1	77	157	31.2386	96	0.932	0	0	0	11	6	aripiprazole	200			19	32	37	88	66	4.86
917	HA	2	57	10	2	82	162	31.2452	100	0.935	0	0	0	21	213	sulpiride	75	1	4	16	25	52	93			5.37	1.82
918	XZ	2	36	1	2	64	143	31.2974	86	0.86	0	0	0	25		clozapine	12.5	0		22	15	44	81	45	4.84	6.03	3.36
919	YF	1	50	8	1	97	176	31.3146	110	1.048	0	0	0	18		clozapine	25	0		16	19	37	72	77	5.6	4.94	10.51
920	HA	1	38	11	1	96	175	31.3469	113	1.037	0	0	0	24	81	risperidone	300	0		14	34	55	103	75
921	WJ	2	30	11	1	82	161	31.6346	114	1.036	1	0	0	22	6	aripiprazole	20	0		7	10	23	40	79	8.7	4.1	4.8
922	HA	2	51	8	1	82	160	32.0312	110	0.917	1	1	0	21	163			1	6	23	22	50	95	55		4.93	2.7
923	HA	2	51	12	1	82	160	32.0312	100	0.877	0	0	0	24	86	aripiprazole	200	0						51	5.27	5.99	2.33
924	HA	2	49	8	2	76	154	32.0459	101	0.971	0	0	0	38	6	amisulpride	450	1	4	27	48	76	151		4.39	3.81	2.64
925	WJ	2	51	8	1	77	155	32.0499	101	1	0	0	0	21		risperidone	240	0		16	21	37	74		5.5	5.28	1.98
926	XZ	1	26	5	1	93	170	32.1799	96	0.932	0	0	0	21	48	aripiprazole	200	0		15	19	46	80	51	4.97	3.86	1.1
927	HA	1	61	9	1	88	165	32.3232	116	1.094	0	1	0	30	129	olanzapine	600	0		13	25	46	84		4.65	4.16	0.91
928	WJ	1	30	8	1	97	173	32.41	112	1.028	0	0	0	20		clozapine	200	0		19	21	31	71	57
929	XZ	2	32	8	2	90	166	32.6608	103	0.936	0	0	0	18	72	risperidone	120			23	25	44	92	48	3.85
930	HA	2	54	6	1	97	172	32.788	117	0.951	0	1	1	13	79	clozapine	75	1	1	20	23	43	86	69	4.59	3.88	1.11
931	XZ	2	24	8	2	84	160	32.8125	110	1.038	0	0	0	19	36	ziprasidone	150			36	27	45	108	69	3.2
932	WJ	2	43	9	2	82	158	32.8473	112	0.966	0	0	0	20		clozapine	12.5	0		16	14	27	57	72
933	WJ	2	60	8	1	92	167	32.9879	112	1	0	1	0	45		clozapine	62.5	0		18	19	43	80	78
934	XZ	2	32	8	2	85	160	33.2031	100	1	0	0	0	22	120	sulpiride	75			13	11	38	62	72	4.98
935	XZ	1	50	9	3	85	160	33.2031	100	1	0	0	0	25		risperidone	120	0		12	23	37	72	67	4.49	4.25	1.77
936	HA	1	51	15	3	95	169	33.2621	110	0.957	1	0	0	26	23	risperidone	360	0		16	16	27	59	67		3.96	2.62
937	XZ	1	33	8	1	95	169	33.2621	100	0.971	0	0	0	28		risperidone	120	0		12	26	32	70	62	6.13	4.53	1.8
938	HA	2	55	11	3	70	145	33.2937	103	0.963	1	1	0	22	122	clozapine	100	0		20	23	46	89	77	6.15	4.38	1.98
939	HA	2	65	8	1	70	145	33.2937	77	0.828	1	0	0	17	480	clozapine	150	0		23	26	53	102		5.07	4.37	0.97
940	HA	2	61	8	2	71	146	33.3083	96	0.889	0	0	0	50	6	risperidone	420	0		14	17	37	68		5.61	5.03	0.86
941	WJ	2	35	5	3	92	166	33.3866	128	1.049	0	0	0	24	6	aripiprazole	400	0		18	20	46	84		4.6	4.43	3.28
942	WJ	1	35	21	1	88	162	33.5315	98	0.961	0	0	0	33		risperidone	180	1		9	19	38	66	82	4.3	5.65	2.44
943	XZ	2	40	8	3	86	160	33.5938	125	1.214	0	0	0	28	72	risperidone	120			21	22	40	83	69	5.48
944	HA	2	64	16	2	80	154	33.7325	103	0.912	0	1	0	31	142	aripiprazole	400	0		18	23	48	89	76	5.44	5.51	2
945	HA	2	62	8	1	91	164	33.834	100	0.971	1	0	0	26	56	Clozapine	200	1	4	23	24	46	93	49	4.48	4.69	2.46
946	WJ	1	28	12	1	99	171	33.8566	117	1.064	0	0	0	21		risperidone	120	0		20	22	38	80	82	6.6	4.14	3.06
947	WJ	1	31	9	1	98	170	33.91	108	1.009	1	0	0	19	6	aripiprazole	400	0		16	21	41	78	64	5.1	5.39	4.54
948	XZ	1	34	8	1	98	170	33.91	96	1	0	0	0	27		clozapine	100	0		20	12	30	62	64	5.19	2.64	1.48
949	HA	2	69	11	1	85	158	34.049	110	0.917	1	1	0	27	377	Escitalopram oxalate		0		25	22	48	95	77	5.6	4.35	0.85
950	WJ	2	51	11	3	82	155	34.1311	112	0.918	0	1	0	28		risperidone	120	0		16	14	32	62	81
951	WJ	1	45	5	3	87	159	34.4132	116	1.084	1	1	0	31		aripiprazole	200	0		17	28	44	89	69	7.4	4.47	3.13
952	XZ	1	33	9	1	103	173	34.4148	100	0.971	0	0	0	21		clozapine	25	0		11	11	36	58	80	5.22	4.4	1.31
953	XZ	2	43	5	3	85	157	34.4842	110	0.973	0	0	0	31	14	risperidone	120	0		14	13	23	50	58	5.47
954	XZ	1	35	6	1	106	175	34.6122	106	1.029	0	0	0	30	30	risperidone	240	0		21	25	51	97	56	5.21
955	YF	1	54	6	1	91	162	34.6746	112	0.982	0	0	0	19		risperidone	240	1	4	12	21	37	70	59		4.98	2.53
956	WJ	1	53	11	3	98	168	34.7222	121	1.071	1	1	0	22		alprazolam		1	2	18	29	39	86	69	7.2	4.95	3.81
957	YF	1	53	9	3	104	173	34.7489	117	1.083	0	1	0	39		aripiprazole	200	0		18	14	37	69	71	6.4	3.11	3.07
958	XZ	2	30	8	1	89	160	34.7656	96	0.96	0	1	0	20	36	clozapine	25			25	30	57	112		4.67
959	XZ	2	35	8	1	89	160	34.7656	106	1.06	0	0	0	19	360	sulpiride	75			22	26	51	99	52	5.6
960	YF	1	43	9	3	102	171	34.8825	106	0.964	0	1	0	28		aripiprazole	400	0		13	16	31	60	83		5.73	3.26
961	XZ	2	50	3	2	79	150	35.1111	89	0.957	0	0	0	26		olanzapine	75	0		31	34	70	135		3.68	3.39	0.86
962	XZ	1	25	8	1	103	170	35.6401	100	0.971	0	0	0	17		clozapine	50	0		15	22	39	76	71	6.49	4.46	2.83
963	HA	2	64	11	2	69	139	35.7124	93	0.869	0	0	0	24	200	aripiprazole	200	0		20	28	52	100	52		5.41	0.61
964	XZ	2	36	1	2	86	155	35.796	96	0.85	0	0	0	32		clozapine	50	0		18	17	33	68	54	5.07	3.37	1.47
965	XZ	1	30	11	1	97	164	36.0648	120	1.176	0	0	0	20		clozapine	100	0		13	29	40	82		5.2	3.94	1.27
966	XZ	2	43	5	1	101	167	36.215	116	1	0	0	0	11				0							4.81	4.84	2.97
967	HA	1	60	8	1	115	178	36.2959	121	1.052	0	0		19	240	olanzapine	300	0		11	36	45	92	50	5.98	4.57	2.15
968	XZ	2	32	5	1	99	165	36.3636	110	0.948	0	0	0	12		clozapine	75	0		24	28	55	107		4.21	3.8	2.06
969	XZ	2	32	8	1	105	169	36.7634	74	0.787	0	0	0	17						18	32	48	98	61
970	XZ	2	55	5	4	89	155	37.0447	96	0.85	0	0	0	25	15	clozapine	75			23	38	49	110		5.7
971	XZ	1	28	11	1	99	162	37.7229	107	0.973	0	0	0	18		risperidone	60	0		26	15	43	84	50	4.82	4.46	1.18
972	XZ	1	25	15	1	120	178	37.874	86	0.905	0	0	0	21		risperidone	240	0		21	11	39	71	70	4.33	2.04	0.38
973	XZ	2	38	11	1	102	163	38.3906	78	0.813	0	0	0	20						8	9	27	44	58	5.55	3.3	1.2
974	WJ	2	35	12	3	112	170	38.7543	123	1.051	0	0	0	22		quetiapine	225	0		16	20	39	75	96
975	XZ	2	39	8	2	90	152	38.9543	72	0.837	0	0	0	31
976	XZ	2	44	8	2	110	168	38.9739	113	0.904	0	0	0	25		ziprasidone	262.5			16	17	30	63	67	6.58
977	WJ	2	27	8	1	97	157	39.3525	116	0.928	0	0	0	27		clozapine	125	1	4	16	30	42	88	54	4.4	3.93	2.23
978	HA	2	58	8	2	97	157	39.3525	123	0.946	0	0	0	35	130	risperidone	120	1	2	20	26	52	98	53		3.93	0.63
979	XZ	1	36	8	1	125	178	39.4521	123	1.118	0	0	0	23				0		13	14	40	67	62	5.21	3.93	1.18
980	XZ	2	27	8	3	95	155	39.5421	77	0.906	0	0	0	24						10	16	27	53	55
981	XZ	1	41	5	1	107	163	40.2725	120	1.395	0	1	0	20	120	clozapine	125	0		19	20	39	78	66	5.12	3.9	1.63
982	XZ	2	59	7	4	100	156	41.0914	89	1.035	0	0	0	48						37	30	69	136		4.34	4.14	1
983	WJ	1	36	9	3	120	170	41.5225	99	0.971	0	0	0	30		olanzapine	450	1	2	23	33	51	107	49	5	4.66	1.91
984	XZ	2	28	8	1	50.3	158	20.149	70	0.795	0	0	0	20						13	15	42	70		4.16	3.14	0.47
985	XZ	2	39	8	3	55.5	158	22.232	86	0.925	0	0	0	19	7	sulpiride	75	0							4.26
986	HA	1	43	8	1	54	158	21.6311	80	0.879	0	0	0	18	6	olanzapine	600	0		9	25	40	74			6.07	1.08
987	HA	1	27	11	1	62	165	22.7732	73	0.89	0	0	0	19	12	risperidone	360	0		9	19	33	61	94		4.32	1.39
988	HA	1	54	17	1	70		#DIV/0!			1	0	0	31	6	clozapine	75	1	2	23	25	38	86	72
										93
